# Supplementary material for: Synthesis of pyrrolo[3,2-d]pyrimidine-2,4(3H)-diones by domino C–N coupling/hydroamination reactions
Source: publisher site journal article supplement (doi:10.3762/bjoc.21.82), 2025-05-22
Supplement: Additional file 1 [file 1860-5397-21-82-S1.pdf]

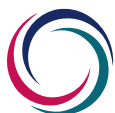

## Supporting Information

for

### Synthesis of pyrrolo[3,2-*d*]pyrimidine-2,4(3*H*)-diones by domino C–N coupling/hydroamination reactions

Ruben Manuel Figueira de Abreu, Robin Tiedemann, Peter Ehlers and Peter Langer

*Beilstein J. Org. Chem.* **2025**, 21, 1010–1017. doi:10.3762/bjoc.21.82

## Experimental section

## Table of contents

|                                                                    |     |
|--------------------------------------------------------------------|-----|
| Experimental section .....                                         | S2  |
| $^1\text{H}$ , $^{13}\text{C}$ , $^{19}\text{F}$ NMR spectra ..... | S8  |
| References .....                                                   | S26 |

## Experimental section

### General information

Nuclear magnetic resonance spectra ( $^1\text{H}/^{13}\text{C}/^{19}\text{F}$  NMR) were recorded on a Bruker AVANCE 300 III, 250 II, or 500. The analysed chemical shifts  $\delta$  are referenced to the residual solvent signals of the deuterated solvents  $\text{CDCl}_3$  ( $\delta = 7.26$  ppm/77.16 ppm). Multiplicities due to spin–spin correlation are reported as follows: s = singlet, d = doublet, dd = double doublet, m = multiplet; they are further described by their coupling constants  $J$ . Infrared spectra (IR) were measured as attenuated total reflection (ATR) experiments using a Nicolet 380 FT-IR spectrometer. The signals were characterised by their wavenumbers and corresponding absorption as very strong (vs), strong (s), medium (m), weak (w) or very weak (vw). UV–vis spectra were recorded on a Cary 60 UV–vis spectrophotometer, and emission spectra were recorded on an Agilent Cary Eclipse fluorescence spectrophotometer. Fluorescence quantum yields have been determined using the fluorescence standard quinine sulfate in 0.05 M  $\text{H}_2\text{SO}_4$ . Basic and high-resolution mass spectra (MS/HRMS) were measured on instruments coupled to a preceding gas chromatograph (GC) or liquid chromatograph (LC). Samples were ionised by electron impact ionisation (EI) on an Agilent 6890/5973 or Agilent 7890/5977 GC–MS equipped with an HP-5 capillary column using helium carrier gas or by electron spray ionisation (ESI) on an Agilent 1200/6210 Time-of-Flight (TOF) LC-MS. The solvents used, dimethylsulfoxide and toluene, were purchased as dry solvents and applied without further purification. Other reagents, catalysts, ligands, acids and bases were used as purchased from commercial suppliers. Column chromatography was performed on Merck Silica gel 60 (particle size 63–200  $\mu\text{m}$ ). Solvents for extraction and column chromatography were distilled prior employment. Compounds **2**, **3a**, **3b**, **3c**, **3d**, **3g**, **3h** were obtained as described previously and their characterisation data are in agreement with reported analysis [1]. Compounds **3e** and **3f** have been synthesized according to a known procedure [1].

### Representative method for the preparation of starting materials

#### Representative method A for the synthesis of **4a–m**.

A mixture of **3** (0.318 mmol; 102 mg),  $\text{Pd}(\text{OAc})_2$  (5 mol %; 0.027 mmol; 4 mg), DPEphos (5 mol %, 0.017 mmol, 9 mg) and  $\text{K}_3\text{PO}_4$  (3 equiv, 0.993 mmol, 198 mg) were dissolved in DMA (5 ml) and stirred for 5 minutes. The corresponding aniline (1.1 equiv; 0.349 mmol, 37.4 mg) was added, and the reaction mixture was stirred at 100 °C for 15 hours. The reaction was neutralised with a saturated, aqueous  $\text{NH}_4\text{Cl}$  solution (1.0 M) and diluted with water (40 ml). The aqueous layer was extracted with dichloromethane (3  $\times$  30 ml). The combined organic

layers were dried over Na<sub>2</sub>SO<sub>4</sub>, concentrated under reduced pressure, and purified by column chromatography (heptane/ethyl acetate).

**5-Bromo-1,3-dimethyl-6-(*m*-tolylethynyl)pyrimidine-2,4(1*H*,3*H*)-dione (3e).** According to the general procedure A of reference [1], compound **3e** was obtained as a brown solid in 97% yield (639 mg, 1.92 mmol, *R*<sub>f</sub> = 0.37 heptane/ethyl acetate, 3:2); mp: 192–194 °C. IR (ATR):  $\tilde{\nu}$  [cm<sup>-1</sup>] = 1691 (s), 1650 (vs), 1537 (s), 1512 (s), 1432 (s), 1372 (m), 1211 (m), 824 (s). <sup>1</sup>H NMR (500 MHz, Chloroform-*d*)  $\delta$  = 7.43 – 7.39 (m, 2H), 7.34 – 7.28 (m, 2H), 3.68 (s, 3H), 3.43 (s, 3H), 2.39 (s, 3H). <sup>13</sup>C {<sup>1</sup>H} NMR (126 MHz, Chloroform-*d*)  $\delta$  = 159.0, 151.0, 138.9, 136.3, 132.7, 132.0, 129.4, 128.8, 120.0, 107.1, 102.3, 80.4, 35.6, 29.6, 21.3. MS (EI, 70 eV): *m/z* (%) = 334 (100, M<sup>+</sup>), 277 (29), 275 (14), 249 (17), 196 (31), 168 (63), 156 (94). HRMS (ESI-TOF): calcd. for C<sub>15</sub>H<sub>14</sub>BrN<sub>2</sub>O<sub>2</sub> [M+H]<sup>+</sup> 333.0233, found: 333.0233.

**5-Bromo-1,3-dimethyl-6-(*o*-tolylethynyl)pyrimidine-2,4(1*H*,3*H*)-dione (3f).** According to the general procedure A of reference [1], compound **3f** was obtained as a brown solid in 60% yield (393 mg, 1.18 mmol, *R*<sub>f</sub> = 0.37 heptane/ethyl acetate, 3:2); mp: 203–205 °C. IR (ATR):  $\tilde{\nu}$  [cm<sup>-1</sup>] = 2206 (m), 1706 (s), 1650 (vs), 1425 (s), 1246 (m), 1123 (m), 1005 (m), 762 (vs). <sup>1</sup>H NMR (500 MHz, Chloroform-*d*)  $\delta$  = 7.57 (dd, *J* = 7.6, 1.4 Hz, 1H), 7.38 (ptd, *J* = 7.5, 1.4 Hz, 1H), 7.29 (d, *J* = 7.7 Hz, 1H), 7.24 (pt, *J* = 7.5 Hz, 1H), 3.69 (s, 3H), 3.43 (s, 3H), 2.54 (s, 3H). <sup>13</sup>C {<sup>1</sup>H} NMR (126 MHz, Chloroform-*d*)  $\delta$  = 159.0, 151.0, 141.7, 136.4, 133.0, 131.1, 130.2, 126.1, 120.2, 106.0, 102.0, 84.3, 35.5, 29.5, 21.1. MS (EI, 70 eV): *m/z* (%) = 332 (100, M<sup>+</sup>), 275 (7), 196 (33), 168 (32), 157 (12), 140 (21), 115 (43). HRMS (ESI-TOF): calcd. For C<sub>15</sub>H<sub>14</sub>BrN<sub>2</sub>O<sub>2</sub> [M+H]<sup>+</sup> 333.0233, found: 333.0242.

**1,3-Dimethyl-5,6-di-*p*-tolyl-1,5-dihydro-2*H*-pyrrolo[3,2-*d*]pyrimidine-2,4(3*H*)-dione (4a).** According to the representative method A, compound **4a** was obtained as a brown solid in 43% yield (45.8 mg, 127  $\mu$ mol, *R*<sub>f</sub> = 0.21 heptane/ethyl acetate, 3:2); mp: 250–252 °C. IR (ATR):  $\tilde{\nu}$  [cm<sup>-1</sup>] = 1687 (s), 1650 (vs), 1531 (s), 1512 (s), 1463 (s), 1444 (s), 1436 (s), 1399 (s). <sup>1</sup>H NMR (500 MHz, Chloroform-*d*)  $\delta$  = 7.18 – 7.14 (m, 2H), 7.14 – 7.10 (m, 2H), 7.09 – 7.06 (m, 2H), 7.06 – 7.03 (m, 2H), 6.18 (s, 1H), 3.55 (s, 3H), 3.36 (s, 3H), 2.37 (s, 3H), 2.30 (s, 3H). <sup>13</sup>C {<sup>1</sup>H} NMR (126 MHz, Chloroform-*d*)  $\delta$  = 155.0, 151.8, 143.1, 138.4, 138.3, 136.5, 134.9, 129.3, 129.2, 128.9, 128.3, 127.9, 111.9, 95.2, 31.8, 28.0, 21.4, 21.3. MS (EI, 70 eV): *m/z* (%) = 359 (100, M<sup>+</sup>), 301 (9), 273 (11), 259 (12), 227 (5), 180 (7), 115 (24). HRMS (ESI-TOF): calcd. for C<sub>22</sub>H<sub>22</sub>N<sub>3</sub>O<sub>2</sub> [M+H]<sup>+</sup> 360.1712, found: 360.1719.

**5-(4-Methoxyphenyl)-1,3-dimethyl-6-(*p*-tolyl)-1,5-dihydro-2*H*-pyrrolo[3,2-*d*]pyrimidine-2,4(3*H*)-dione (4b).** According to the representative method A, compound **4b** was obtained as

a brown solid in 50% yield (56.3 mg, 150  $\mu$ mol,  $R_f$  = 0.22 heptane/ethyl acetate, 3:2); mp: 212–214 °C. IR (ATR):  $\tilde{\nu}$  [ $\text{cm}^{-1}$ ] = 1693 (m), 1650 (m), 1644 (m), 1512 (m), 1055 (vs), 964 (s), 795 (s).  $^1\text{H}$  NMR (300 MHz, Chloroform- $d$ )  $\delta$  = 7.17 – 7.13 (m, 2H), 7.09 – 7.03 (m, 4H), 6.89 – 6.85 (m, 2H), 6.17 (s, 1H), 3.81 (s, 3H), 3.55 (s, 3H), 3.36 (s, 3H), 2.30 (s, 3H).  $^{13}\text{C}$   $\{^1\text{H}\}$  NMR (75 MHz, Chloroform- $d$ )  $\delta$  = 159.4, 155.1, 151.8, 143.2, 138.5, 136.4, 130.3, 129.6, 129.2, 128.9, 127.9, 113.8, 112.0, 95.1, 55.5, 31.9, 28.0, 21.3. MS (EI, 70 eV):  $m/z$  (%) = 375 (71,  $\text{M}^+$ ), 275 (5), 227 (7), 146 (96), 118 (56), 104 (47). HRMS (ESI-TOF): calcd. for  $\text{C}_{22}\text{H}_{22}\text{N}_3\text{O}_3$   $[\text{M}+\text{H}]^+$  376.1656, found: 376.1661.

**1,3-Dimethyl-5-phenyl-6-(*p*-tolyl)-1,5-dihydro-2*H*-pyrrolo[3,2-*d*]pyrimidine-2,4(3*H*)-dione (4c).** According to the representative method A, compound **4c** was obtained as a brown solid in 46% yield (47.3 mg, 137  $\mu$ mol,  $R_f$  = 0.17 heptane/ethyl acetate, 3: 2); mp: 205–207 °C. IR (ATR):  $\tilde{\nu}$  [ $\text{cm}^{-1}$ ] = 1687 (s), 1650 (vs), 1531 (s), 1428 (s), 1312 (m), 1188 (m), 1020 (m), 768 (s).  $^1\text{H}$  NMR (300 MHz, Chloroform- $d$ )  $\delta$  = 7.32 – 7.25 (m, 3H), 7.19 – 7.13 (m, 2H), 6.96 (m, 4H), 6.12 (s, 1H), 3.47 (s, 3H), 3.28 (s, 3H), 2.21 (s, 3H).  $^{13}\text{C}$   $\{^1\text{H}\}$  NMR (75 MHz, Chloroform- $d$ )  $\delta$  = 155.0, 151.8, 143.1, 138.5, 137.5, 136.6, 129.2, 128.9, 128.7, 128.6, 128.5, 127.8, 111.9, 95.4, 31.9, 28.0, 21.3. MS (EI, 70 eV):  $m/z$  (%) = 345 (100,  $\text{M}^+$ ), 287 (13), 259 (23), 245 (5), 172 (7), 115 (26). HRMS (ESI-TOF): calcd. for  $\text{C}_{21}\text{H}_{20}\text{N}_3\text{O}_2$   $[\text{M}+\text{H}]^+$  346.1555, found: 346.1555.

**1,3-Dimethyl-6-phenyl-5-(*p*-tolyl)-1,5-dihydro-2*H*-pyrrolo[3,2-*d*]pyrimidine-2,4(3*H*)-dione (4d).** According to the representative method A, compound **4d** was obtained as a brown solid in 40% yield (43.9 mg, 127  $\mu$ mol,  $R_f$  = 0.16 heptane/ethyl acetate, 3: 2); mp: 225–227 °C. IR (ATR):  $\tilde{\nu}$  [ $\text{cm}^{-1}$ ] = 1687 (s), 1650 (vs), 1512 (s), 1444 (s), 1374 (s), 1246 (m), 1116 (m), 1032 (m).  $^1\text{H}$  NMR (300 MHz, Chloroform- $d$ )  $\delta$  = 7.20 – 7.14 (m, 3H), 7.14 – 7.02 (m, 6H), 6.13 (s, 1H), 3.48 (s, 3H), 3.29 (s, 3H), 2.29 (s, 3H).  $^{13}\text{C}$   $\{^1\text{H}\}$  NMR (75 MHz, Chloroform- $d$ )  $\delta$  = 155.1, 151.8, 142.9, 138.5, 136.5, 134.8, 130.9, 129.3, 129.1, 128.4, 128.4, 112.1, 95.5, 31.9, 28.0, 21.4 (signal of one carbon is absent, which may relate to signal overlap). MS (EI, 70 eV):  $m/z$  (%) = 345 (100,  $\text{M}^+$ ), 293 (44), 287 (71), 273 (19), 259 (84), 245 (74), 228 (27). HRMS (ESI-TOF): calcd. for  $\text{C}_{21}\text{H}_{20}\text{N}_3\text{O}_2$   $[\text{M}+\text{H}]^+$  346.1555, found: 346.1561.

**1,3-Dimethyl-5-(*o*-tolyl)-6-(*p*-tolyl)-1,5-dihydro-2*H*-pyrrolo[3,2-*d*]pyrimidine-2,4(3*H*)-dione (4e).** According to the representative method A, compound **4e** was obtained as a brown solid in 53% yield (108 mg, 301  $\mu$ mol,  $R_f$  = 0.29 heptane/ethyl acetate, 3:2); mp: 166–168 °C. IR (ATR):  $\tilde{\nu}$  [ $\text{cm}^{-1}$ ] = 1693 (s), 1650 (vs), 1531 (m), 1425 (m), 1327 (m), 1242 (m), 1127 (m), 745 (s).  $^1\text{H}$  NMR (500 MHz, Chloroform- $d$ )  $\delta$  = 7.35 – 7.29 (m, 1H), 7.25 – 7.20 (m, 3H), 7.09 – 7.05 (m, 2H), 7.05 – 7.00 (m, 2H), 6.23 (s, 1H), 3.57 (s, 3H), 3.35 (s, 3H), 2.28 (s, 3H),

1.96 (s, 3H).  $^{13}\text{C}$   $\{^1\text{H}\}$  NMR (126 MHz, Chloroform-*d*)  $\delta$  = 155.0, 151.9, 142.9, 138.6, 137.1, 136.5, 136.4, 130.7, 129.2, 129.1, 129.1, 128.4, 127.8, 126.4, 111.7, 94.7, 31.9, 28.0, 21.3, 17.7. MS (EI, 70 eV):  $m/z$  (%) = 359 (21,  $\text{M}^+$ ), 344 (86), 341 (45), 301 (63), 273 (89), 259 (80), 245 (60). HRMS (ESI-TOF): calcd. for  $\text{C}_{22}\text{H}_{21}\text{N}_3\text{O}_2$   $[\text{M}+\text{H}]^+$  360.1707, found: 360.1711.

**5-(2-Bromophenyl)-1,3-dimethyl-6-(*p*-tolyl)-1,5-dihydro-2*H*-pyrrolo[3,2-*d*]pyrimidine-2,4(3*H*)-dione (4f).** According to the representative method A, compound **4f** was obtained as a brown solid in 39% yield (51 mg, 120  $\mu\text{mol}$ ,  $R_f$  = 0.25 heptane/ethyl acetate, 3:2); mp: 157–159 °C. IR (ATR):  $\tilde{\nu}$  [ $\text{cm}^{-1}$ ] = 1691 (s), 1648 (vs), 1477 (s), 1318 (m), 1195 (m), 1028 (m), 797 (s), 745 (s).  $^1\text{H}$  NMR (300 MHz, Chloroform-*d*)  $\delta$  = 7.64 – 7.60 (m, 1H), 7.35 – 7.24 (m, 3H), 7.14 – 7.10 (m, 2H), 7.06 – 7.02 (m, 2H), 6.23 (s, 1H), 3.56 (s, 3H), 3.35 (s, 3H), 2.29 (s, 3H).  $^{13}\text{C}$   $\{^1\text{H}\}$  NMR (75 MHz, Chloroform-*d*)  $\delta$  = 154.9, 151.9, 143.2, 138.9, 137.4, 136.5, 133.1, 130.8, 130.5, 129.3, 128.7, 127.9, 127.5, 124.1, 111.8, 95.4, 32.0, 28.0, 21.4. MS (EI, 70 eV):  $m/z$  (%) = 423(79,  $\text{M}^+$ ), 345 (64), 328 (12), 287 (24), 259 (18), 231 (16), 216 (10). HRMS (ESI-TOF): calcd. for  $\text{C}_{21}\text{H}_{19}\text{BrN}_3\text{O}_2$   $[\text{M}+\text{H}]^+$  424.0655, found: 424.0664.

**1,3-Dimethyl-6-(*o*-tolyl)-5-(*p*-tolyl)-1,5-dihydro-2*H*-pyrrolo[3,2-*d*]pyrimidine-2,4(3*H*)-dione (4g).** According to the representative method A, compound **4g** was obtained as a brown solid in 48% yield (78 mg, 217  $\mu\text{mol}$ ,  $R_f$  = 0.27 heptane/ethyl acetate, 3:2); mp: 230–232 °C. IR (ATR):  $\tilde{\nu}$  [ $\text{cm}^{-1}$ ] = 1693 (vs), 1650 (vs), 1514 (s), 1403 (m), 1333 (m), 1240 (m), 1106 (m), 762 (s).  $^1\text{H}$  NMR (300 MHz, Chloroform-*d*)  $\delta$  = 7.24 – 7.18 (m, 1H), 7.14 – 7.08 (m, 3H), 7.07 – 6.99 (m, 4H), 6.07 (s, 1H), 3.55 (s, 3H), 3.38 (s, 3H), 2.29 (s, 3H), 2.10 (s, 3H).  $^{13}\text{C}$   $\{^1\text{H}\}$  NMR (75 MHz, Chloroform-*d*)  $\delta$  = 155.1, 151.9, 142.8, 137.9, 137.6, 136.4, 134.3, 131.3, 130.7, 130.2, 129.1, 128.9, 127.7, 125.5, 111.0, 96.4, 31.9, 28.0, 21.3, 20.3. MS (EI, 70 eV):  $m/z$  (%) = 359 (100,  $\text{M}^+$ ), 344 (10), 273 (8), 259 (7), 115 (15). HRMS (EI): calcd. for  $\text{C}_{22}\text{H}_{21}\text{N}_3\text{O}_2$   $[\text{M}]^+$  359.16283, found: 359.16196.

**1,3-Dimethyl-6-(*m*-tolyl)-5-(*p*-tolyl)-1,5-dihydro-2*H*-pyrrolo[3,2-*d*]pyrimidine-2,4(3*H*)-dione (4h).** According to the representative method A, compound **4h** was obtained as a brown solid in 26% yield (42.1 mg, 117  $\mu\text{mol}$ ,  $R_f$  = 0.28 heptane/ethyl acetate, 3: 2); mp: 211–213 °C. IR (ATR):  $\tilde{\nu}$  [ $\text{cm}^{-1}$ ] = 1691 (vs), 1654 (vs), 1531 (s), 1475 (s), 1372 (s), 1207 (m), 110 (m), 748 (s).  $^1\text{H}$  NMR (300 MHz, Chloroform-*d*)  $\delta$  = 7.18 – 7.04 (m, 7H), 6.94 – 6.88 (m, 1H), 6.20 (s, 1H), 3.55 (s, 3H), 3.36 (s, 3H), 2.37 (s, 3H), 2.26 (s, 3H).  $^{13}\text{C}$   $\{^1\text{H}\}$  NMR (75 MHz, Chloroform-*d*)  $\delta$  = 155.1, 151.8, 143.1, 138.4, 138.1, 136.4, 134.9, 130.7, 129.8, 129.3, 129.2, 128.3, 128.2, 126.2, 112.1, 95.4, 31.9, 28.0, 21.4, 21.4 (signals of two carbons are absent, which may relate to signal overlap). MS (EI, 70 eV):  $m/z$  (%) = 359 (100,  $\text{M}^+$ ), 301 (22), 273 (31), 259 (31), 242 (8), 129 (11). HRMS (EI): calcd. for  $\text{C}_{22}\text{H}_{21}\text{N}_3\text{O}_2$   $[\text{M}]^+$  359.16283, found: 359.16188.

**5-(4-Fluorophenyl)-1,3-dimethyl-6-(*p*-tolyl)-1,5-dihydro-2*H*-pyrrolo[3,2-*d*]pyrimidine-2,4(3*H*)-dione (4i).** According to the representative method A, compound **4i** was obtained as a brown solid in 42% yield (45.8 mg, 126  $\mu$ mol,  $R_f$  = 0.17 heptane/ethyl acetate, 3: 2); mp: 208–210 °C. IR (ATR):  $\tilde{\nu}$  [ $\text{cm}^{-1}$ ] = 1687 (s), 1654 (vs), 1531 (s), 1506 (s), 1417 (s), 1463 (s), 1224 (s), 805 (vs).  $^1\text{H}$  NMR (300 MHz, Chloroform-*d*)  $\delta$  = 7.24 – 7.18 (m, 2H), 7.04 (m, 6H), 6.19 (s, 1H), 3.55 (s, 3H), 3.36 (s, 3H), 2.31 (s, 3H).  $^{19}\text{F}$  NMR (282 MHz, Chloroform-*d*)  $\delta$  = -112.7.  $^{13}\text{C}$  { $^1\text{H}$ } NMR (75 MHz, Chloroform-*d*)  $\delta$  = 162.2 (d,  $J$  = 248.4 Hz), 155.1, 151.7, 143.3, 138.8, 136.6, 133.5 (d,  $J$  = 3.3 Hz), 130.4 (d,  $J$  = 8.8 Hz), 129.3, 129.0, 127.6, 115.6 (d,  $J$  = 23.0 Hz), 111.9, 95.6, 31.9, 28.0, 21.3. MS (EI, 70 eV):  $m/z$  (%) = 363 (100,  $\text{M}^+$ ), 305 (19), 277 (44), 227 (9), 182 (11), 142 (8). HRMS (ESI-TOF): calcd. for  $\text{C}_{21}\text{H}_{19}\text{FN}_3\text{O}_2$  [ $\text{M}+\text{H}$ ] $^+$  364.1461, found: 364.1462.

**1,3-Dimethyl-6-(*p*-tolyl)-5-(4-(trifluoromethyl)phenyl)-1,5-dihydro-2*H*-pyrrolo[3,2-*d*]pyrimidine-2,4(3*H*)-dione (4j).** According to the representative method A, compound **4j** was obtained as a brown solid in 38% yield (48 mg, 116  $\mu$ mol,  $R_f$  = 0.19 heptane/ethyl acetate, 3:2); mp: 250–252 °C. IR (ATR):  $\tilde{\nu}$  [ $\text{cm}^{-1}$ ] = 1687 (s), 1654 (vs), 1528 (s), 1333 (vs), 1156 (s), 1110 (vs), 1069 (s), 984 (s).  $^1\text{H}$  NMR (300 MHz, Chloroform-*d*)  $\delta$  = 7.63 – 7.59 (m, 2H), 7.39 – 7.33 (m, 2H), 7.08 – 6.98 (m, 4H), 6.23 (s, 1H), 3.56 (s, 3H), 3.36 (s, 3H), 2.31 (s, 3H).  $^{19}\text{F}$  NMR (282 MHz, Chloroform-*d*)  $\delta$  = -62.5.  $^{13}\text{C}$  { $^1\text{H}$ } NMR (75 MHz, Chloroform-*d*)  $\delta$  = 155.1, 151.7, 143.3, 140.4, 139.0, 137.0, 130.3 (q,  $J$  = 33.0 Hz), 129.4, 129.3, 129.2, 129.0, 127.3, 125.7 (q,  $J$  = 3.7 Hz), 122.1, 118.5, 111.6, 96.3, 32.0, 28.1, 21.3 (signals of five carbons are absent, which may relate to signal overlap). MS (EI, 70 eV):  $m/z$  (%) = 413 (100,  $\text{M}^+$ ), 327 (11), 259 (4), 205 (5). HRMS (ESI-TOF): calcd. for  $\text{C}_{22}\text{H}_{19}\text{F}_3\text{N}_3\text{O}_2$  [ $\text{M}+\text{H}$ ] $^+$  414.1429, found: 414.1437.

**6-(4-(Dimethylamino)phenyl)-1,3-dimethyl-5-(*p*-tolyl)-1,5-dihydro-2*H*-pyrrolo[3,2-*d*]pyrimidine-2,4(3*H*)-dione (4k).** According to the representative method A, compound **4k** was obtained as a brown solid in 33% yield (35.6 mg, 91.6  $\mu$ mol,  $R_f$  = 0.13 heptane/ethyl acetate, 3:2); mp: 209–211 °C. IR (ATR):  $\tilde{\nu}$  [ $\text{cm}^{-1}$ ] = 1681 (s), 1652 (vs), 1605 (s), 1514 (s), 1432 (s), 1355 (s), 1246 (s), 1120 (s).  $^1\text{H}$  NMR (300 MHz, Chloroform-*d*)  $\delta$  = 7.16 (d,  $J$  = 1.9 Hz, 4H), 7.07 – 7.00 (m, 2H), 6.57 – 6.51 (m, 2H), 6.10 (s, 1H), 3.54 (s, 3H), 3.35 (s, 3H), 2.93 (s, 6H), 2.38 (s, 3H).  $^{13}\text{C}$  { $^1\text{H}$ } NMR (75 MHz, Chloroform-*d*)  $\delta$  = 154.9, 151.9, 150.2, 143.9, 138.2, 136.7, 135.4, 129.9, 129.3, 128.5, 118.2, 111.7, 111.5, 94.0, 40.2, 31.9, 28.0, 21.4. MS (EI, 70 eV):  $m/z$  (%) = 388 (100,  $\text{M}^+$ ), 274 (29), 366 (87), 331 (16), 302 (31), 288 (29), 270 (79). HRMS (ESI-TOF): calcd. for  $\text{C}_{23}\text{H}_{25}\text{N}_4\text{O}_2$  [ $\text{M}+\text{H}$ ] $^+$  389.1977, found: 389.1980.

**6-(4-(Dimethylamino)phenyl)-1,3-dimethyl-5-(4-(fluoromethyl)phenyl)-1,5-dihydro-2H-pyrrolo[3,2-*d*]pyrimidine-2,4(3*H*)-dione (4l).** According to the representative method A, compound **4l** was obtained as a brown solid in 23% yield (28.6 mg, 64.6  $\mu$ mol,  $R_f$  = 0.23 heptane/ethyl acetate, 3:2); mp: 269–271 °C. IR (ATR):  $\tilde{\nu}$  [ $\text{cm}^{-1}$ ] = 1683 (s), 1652 (vs), 1603 (s), 1473 (s), 1397 (s), 1329 (vs), 1156 (vs), 1110 (vs).  $^1\text{H}$  NMR (300 MHz, Chloroform-*d*)  $\delta$  = 7.66 – 7.59 (m, 2H), 7.42 – 7.36 (m, 2H), 7.00 – 6.94 (m, 2H), 6.57 – 6.51 (m, 2H), 6.15 (s, 1H), 3.55 (s, 3H), 3.36 (s, 3H), 2.95 (s, 6H).  $^{19}\text{F}$  NMR (282 MHz, Chloroform-*d*)  $\delta$  = -62.4.  $^{13}\text{C}$  { $^1\text{H}$ } NMR (75 MHz, Chloroform-*d*)  $\delta$  = 155.0, 151.7, 150.4, 144.2, 140.9, 137.3, 130.1 (q,  $J$  = 32.8 Hz), 130.0, 129.3, 125.7 (q,  $J$  = 3.8 Hz), 124.0 (d,  $J$  = 272.4 Hz), 117.3, 111.8, 111.1, 95.1, 40.2, 32.0, 28.0. MS (EI, 70 eV):  $m/z$  (%) = 442 (41,  $\text{M}^+$ ), 428 (55), 423 (21), 384 (15), 356 (28), 340 (9), 270 (31). HRMS (ESI-TOF): calcd. for  $\text{C}_{23}\text{H}_{21}\text{F}_3\text{N}_4\text{O}_2$  [ $\text{M}+\text{H}$ ] $^+$  443.1689, found: 443.1694.

**1,3-Dimethyl-6-(thiophen-3-yl)-5-(*p*-tolyl)-1,5-dihydro-2H-pyrrolo[3,2-*d*]pyrimidine-2,4(3*H*)-dione (4m).** According to the representative method A, compound **4m** was obtained as a brown solid in 39% yield (42.9 mg, 122  $\mu$ mol,  $R_f$  = 0.10 heptane/ethyl acetate, 3:2); mp: 208–210 °C. IR (ATR):  $\tilde{\nu}$  [ $\text{cm}^{-1}$ ] = 1687, 1648 (vs), 1533 (s), 1514 (s), 1413 (s), 1287 (m), 1114 (m), 966 (m), 778 (s).  $^1\text{H}$  NMR (300 MHz, Chloroform-*d*)  $\delta$  = 7.2 – 7.1 (m, 5H), 6.8 (dd,  $J$  = 5.1, 1.3 Hz, 1H), 6.8 (dd,  $J$  = 2.9, 1.3 Hz, 1H), 6.2 (s, 1H), 3.5 (s, 3H), 3.3 (s, 3H), 2.4 (s, 3H).  $^{13}\text{C}$  { $^1\text{H}$ } NMR (75 MHz, Chloroform-*d*)  $\delta$  = 155.0, 151.8, 139.1, 138.1, 136.3, 135.2, 131.3, 129.7, 128.2, 127.5, 125.7, 124.0, 112.0, 94.6, 31.9, 28.0, 21.5. MS (EI, 70 eV):  $m/z$  (%) = 351 (100,  $\text{M}^+$ ), 336 (19), 293 (83), 279 (30), 265 (87), 251 (83), 237 (26). HRMS (ESI-TOF): calcd. for  $\text{C}_{19}\text{H}_{18}\text{N}_3\text{O}_2\text{S}$  [ $\text{M}+\text{H}$ ] $^+$  352.1120, found: 352.1127.

# <sup>1</sup>H, <sup>13</sup>C, <sup>19</sup>F NMR spectra

## 5-Bromo-1,3-dimethyl-6-(*m*-tolylethynyl)pyrimidine-2,4(1*H*,3*H*)-dione (3e)

| Parameter                | Value             |
|--------------------------|-------------------|
| 1 Solvent                | CDCl <sub>3</sub> |
| 2 Temperature            | 298.1             |
| 3 Pulse Sequence         | zg30              |
| 4 Experiment             | 1D                |
| 5 Number of Scans        | 16                |
| 6 Receiver Gain          | 101.0             |
| 7 Relaxation Delay       | 1.0000            |
| 8 Pulse Width            | 8.0000            |
| 9 Spectrometer Frequency | 500.13            |
| 10 Spectral Width        | 10000.0           |
| 11 Lowest Frequency      | -1958.2           |
| 12 Nucleus               | <sup>1</sup> H    |
| 13 Acquired Size         | 32768             |
| 14 Spectral Size         | 65536             |

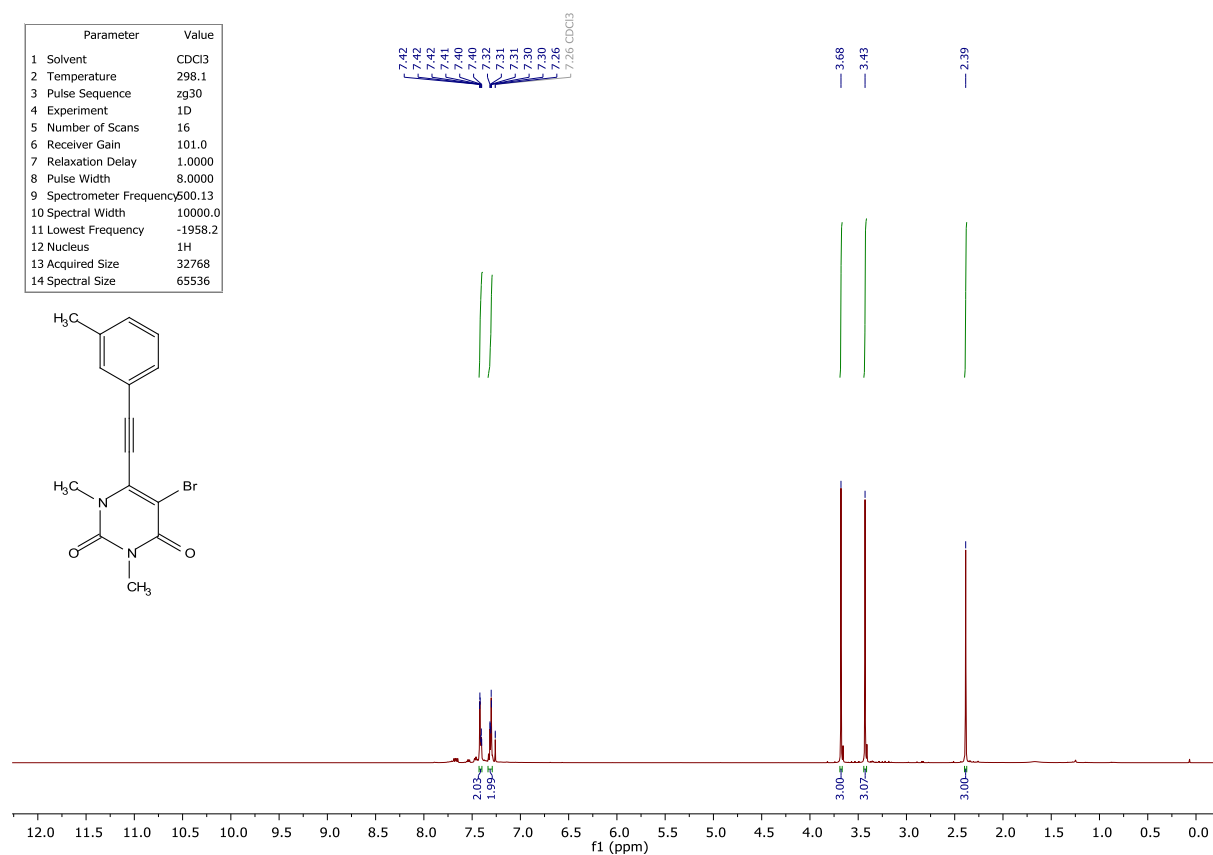

| Parameter                | Value             |
|--------------------------|-------------------|
| 1 Solvent                | CDCl <sub>3</sub> |
| 2 Temperature            | 298.2             |
| 3 Pulse Sequence         | zgpg30            |
| 4 Experiment             | 1D                |
| 5 Number of Scans        | 1024              |
| 6 Receiver Gain          | 101.0             |
| 7 Relaxation Delay       | 2.0000            |
| 8 Pulse Width            | 10.0000           |
| 9 Spectrometer Frequency | 125.77            |
| 10 Spectral Width        | 30120.5           |
| 11 Lowest Frequency      | -2471.5           |
| 12 Nucleus               | <sup>13</sup> C   |
| 13 Acquired Size         | 32768             |
| 14 Spectral Size         | 65536             |

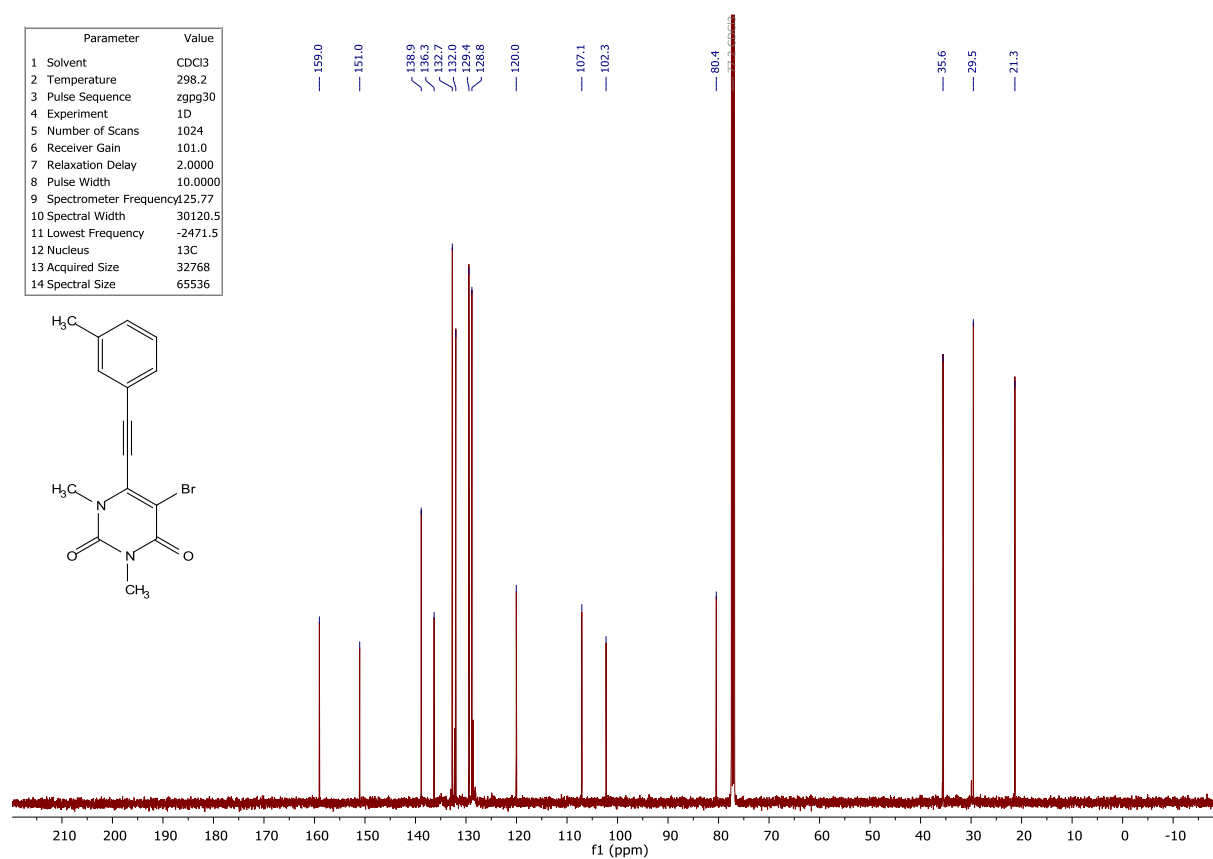

# 5-Bromo-1,3-dimethyl-6-(*o*-tolylethynyl)pyrimidine-2,4(1*H*,3*H*)-dione (3f)

| Parameter                | Value             |
|--------------------------|-------------------|
| 1 Solvent                | CDCl <sub>3</sub> |
| 2 Temperature            | 298.2             |
| 3 Pulse Sequence         | zg30              |
| 4 Experiment             | 1D                |
| 5 Number of Scans        | 16                |
| 6 Receiver Gain          | 101.0             |
| 7 Relaxation Delay       | 1.0000            |
| 8 Pulse Width            | 8.0000            |
| 9 Spectrometer Frequency | 500.13            |
| 10 Spectral Width        | 10000.0           |
| 11 Lowest Frequency      | -1924.8           |
| 12 Nucleus               | <sup>1</sup> H    |
| 13 Acquired Size         | 32768             |
| 14 Spectral Size         | 65536             |

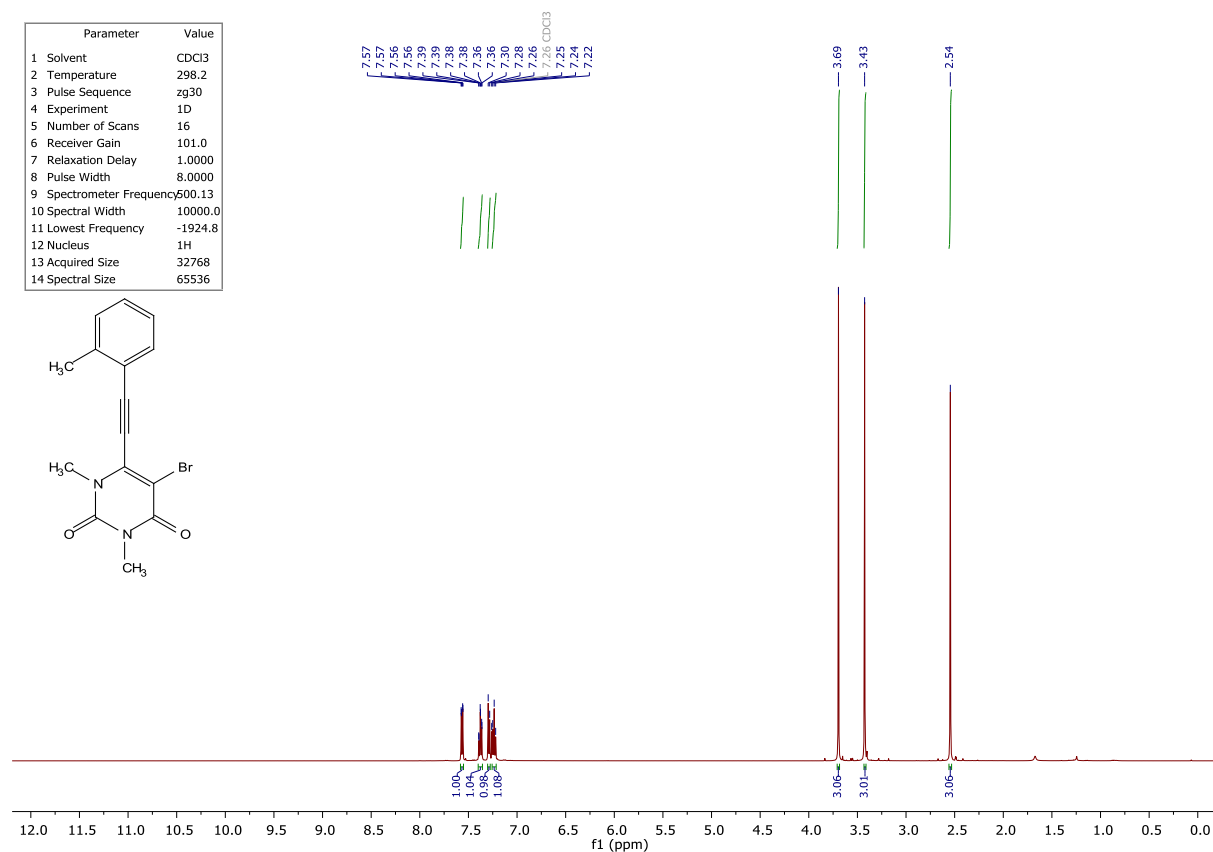

| Parameter                | Value             |
|--------------------------|-------------------|
| 1 Solvent                | CDCl <sub>3</sub> |
| 2 Temperature            | 298.2             |
| 3 Pulse Sequence         | zgpg30            |
| 4 Experiment             | 1D                |
| 5 Number of Scans        | 1024              |
| 6 Receiver Gain          | 101.0             |
| 7 Relaxation Delay       | 2.0000            |
| 8 Pulse Width            | 10.0000           |
| 9 Spectrometer Frequency | 125.77            |
| 10 Spectral Width        | 30120.5           |
| 11 Lowest Frequency      | -2472.8           |
| 12 Nucleus               | <sup>13</sup> C   |
| 13 Acquired Size         | 32768             |
| 14 Spectral Size         | 65536             |

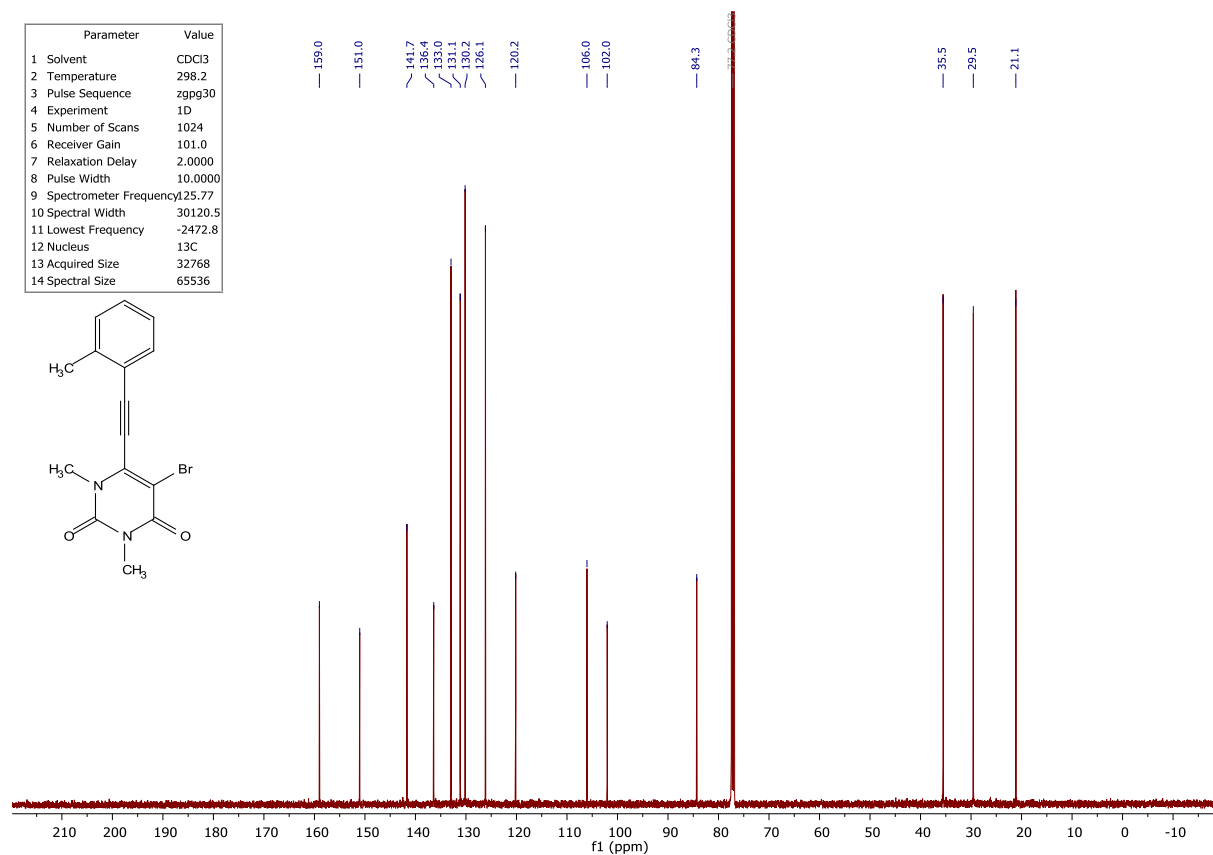

# 1,3-Dimethyl-5,6-di-*p*-tolyl-1,5-dihydro-2*H*-pyrrolo[3,2-*d*]pyrimidine-2,4(3*H*)-dione (4a).

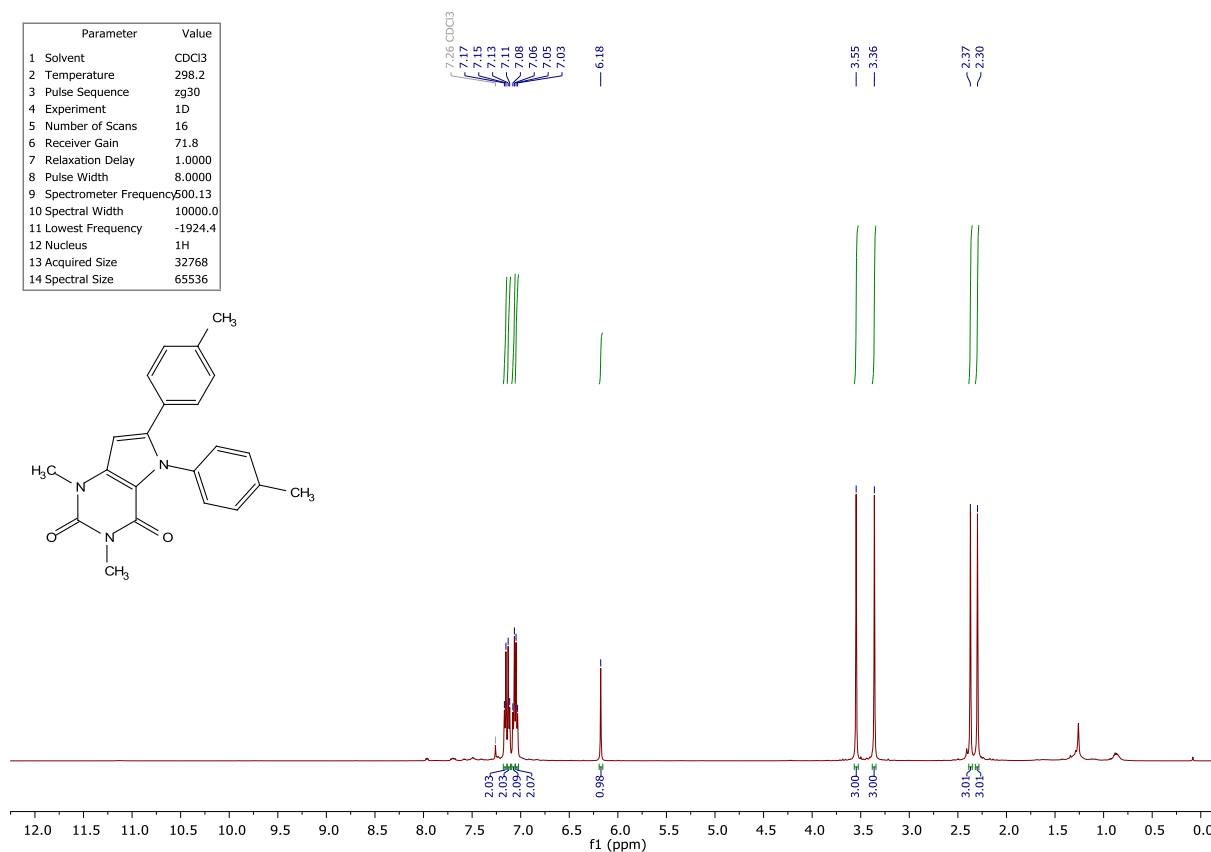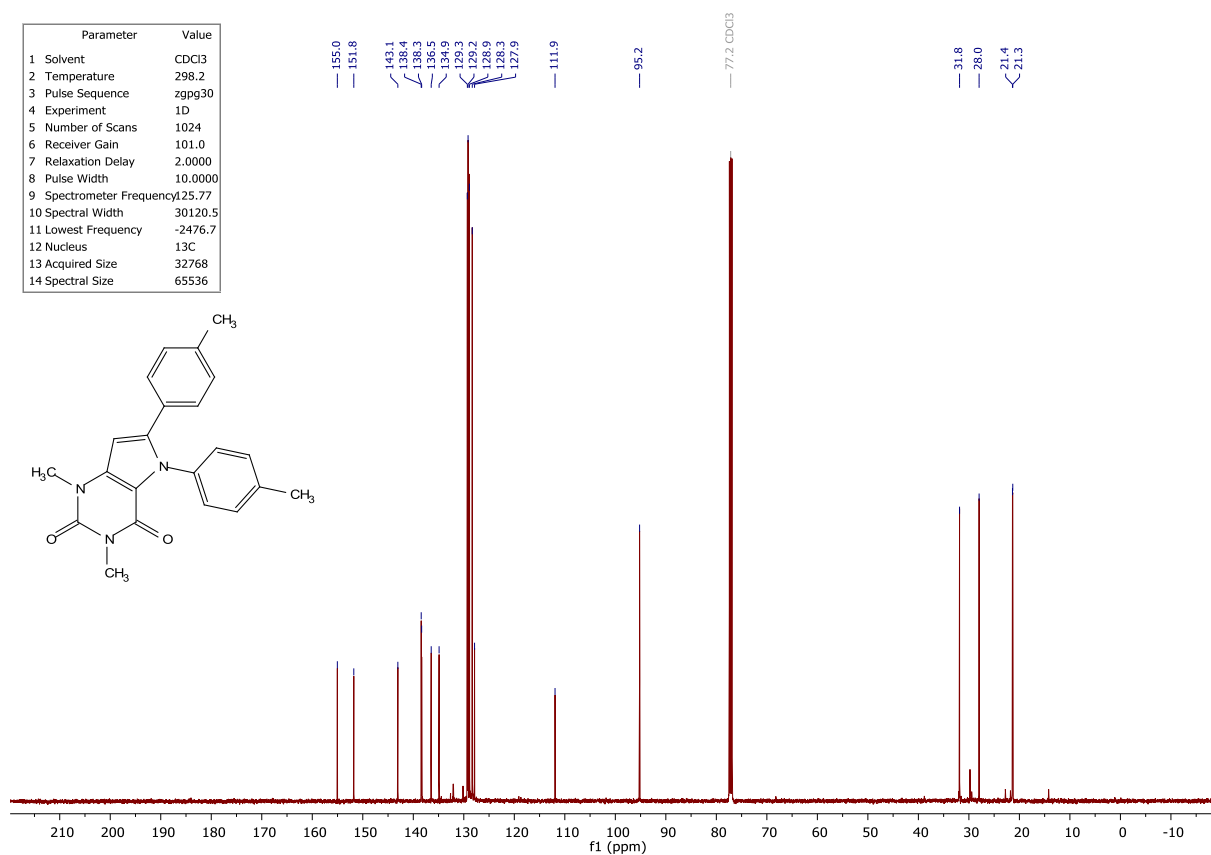

# **5-(4-Methoxyphenyl)-1,3-dimethyl-6-(*p*-tolyl)-1,5-dihydro-2*H*-pyrrolo[3,2-*d*]pyrimidine-2,4(3*H*)-dione (4b)**

| Parameter                | Value             |
|--------------------------|-------------------|
| 1 Solvent                | CDCl <sub>3</sub> |
| 2 Temperature            | 298.1             |
| 3 Pulse Sequence         | zg30              |
| 4 Experiment             | 1D                |
| 5 Number of Scans        | 16                |
| 6 Receiver Gain          | 101.0             |
| 7 Relaxation Delay       | 1.0000            |
| 8 Pulse Width            | 8.0000            |
| 9 Spectrometer Frequency | 500.13            |
| 10 Spectral Width        | 10000.0           |
| 11 Lowest Frequency      | -1924.8           |
| 12 Nucleus               | <sup>1</sup> H    |
| 13 Acquired Size         | 32768             |
| 14 Spectral Size         | 65536             |

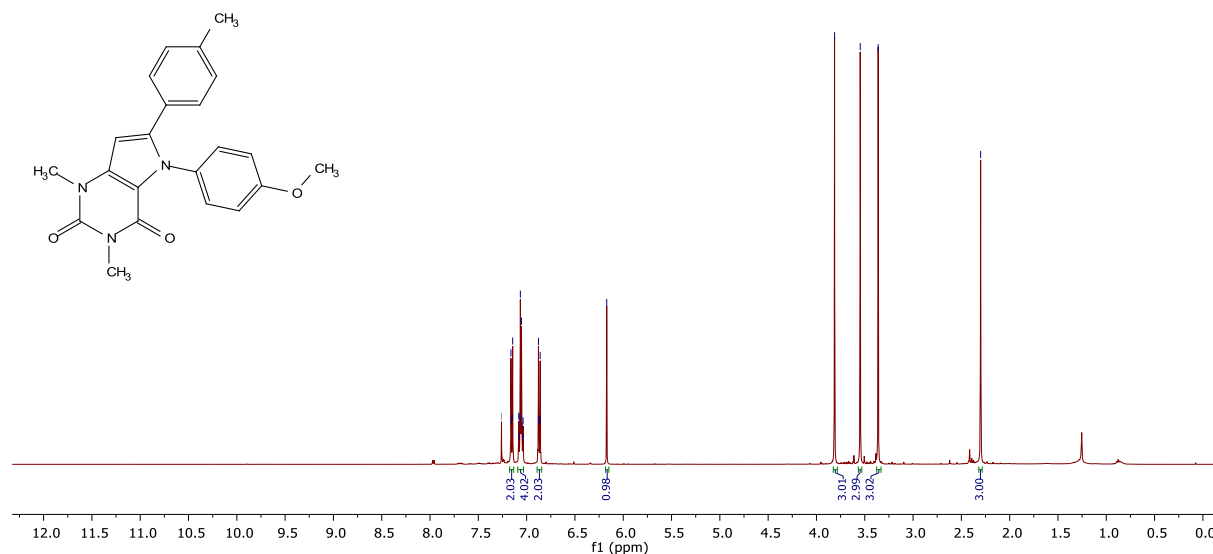

| Parameter                | Value             |
|--------------------------|-------------------|
| 1 Solvent                | CDCl <sub>3</sub> |
| 2 Temperature            | 298.2             |
| 3 Pulse Sequence         | zgpg30            |
| 4 Experiment             | 1D                |
| 5 Number of Scans        | 1024              |
| 6 Receiver Gain          | 101.0             |
| 7 Relaxation Delay       | 2.0000            |
| 8 Pulse Width            | 10.0000           |
| 9 Spectrometer Frequency | 125.77            |
| 10 Spectral Width        | 30120.5           |
| 11 Lowest Frequency      | -2472.9           |
| 12 Nucleus               | <sup>13</sup> C   |
| 13 Acquired Size         | 32768             |
| 14 Spectral Size         | 65536             |

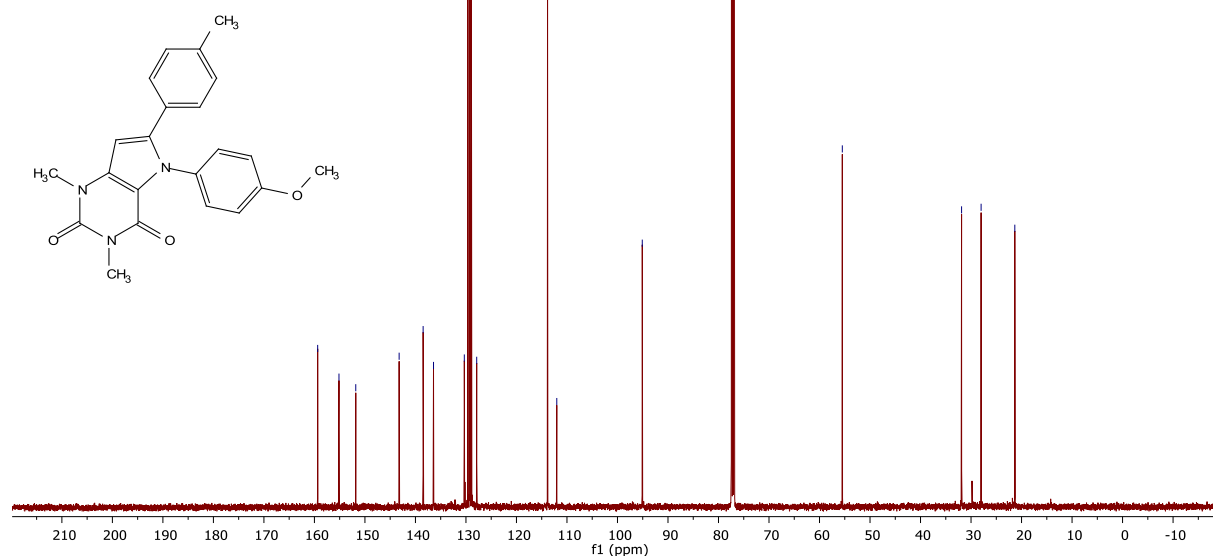

# 1,3-Dimethyl-5-phenyl-6-(*p*-tolyl)-1,5-dihydro-2*H*-pyrrolo[3,2-*d*]pyrimidine-2,4(3*H*)-dione (4c)

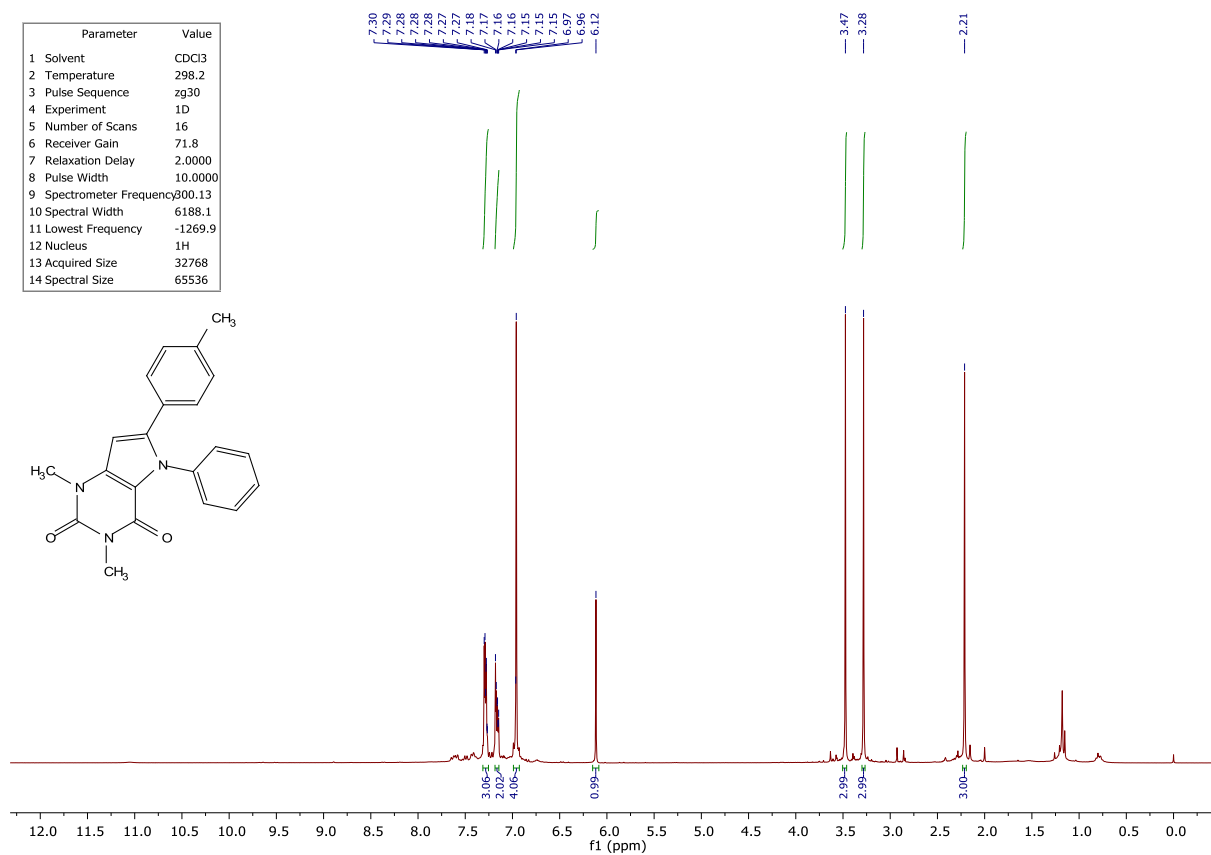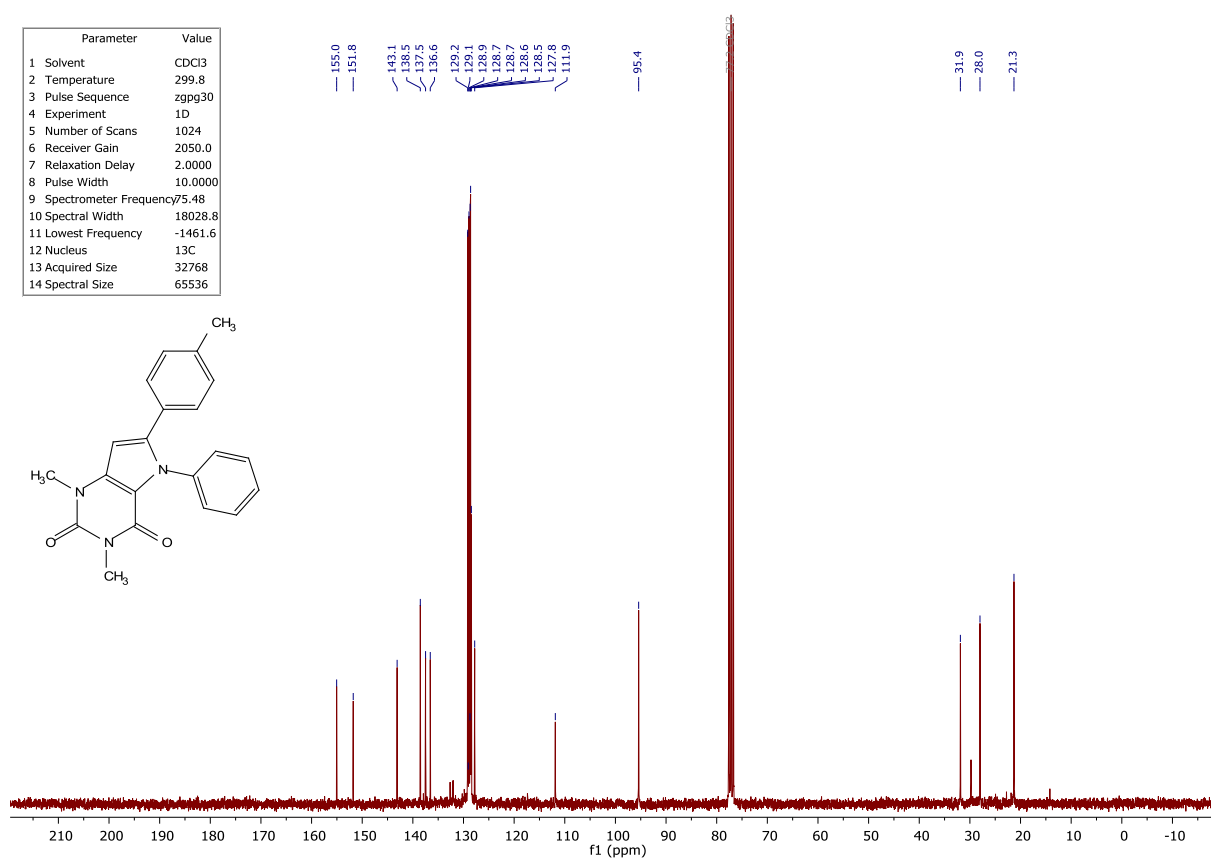

# 1,3-Dimethyl-6-phenyl-5-(*p*-tolyl)-1,5-dihydro-2*H*-pyrrolo[3,2-*d*]pyrimidine-2,4(3*H*)-dione (4d)

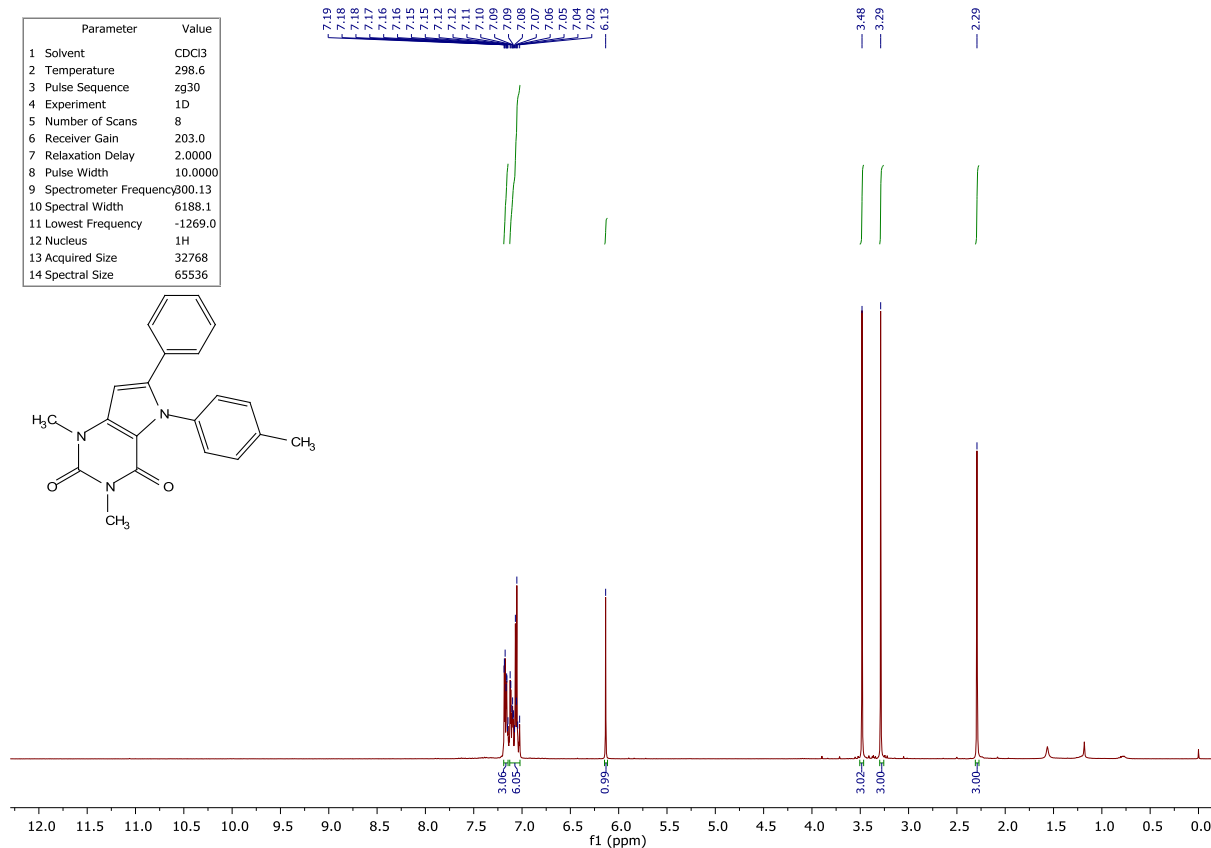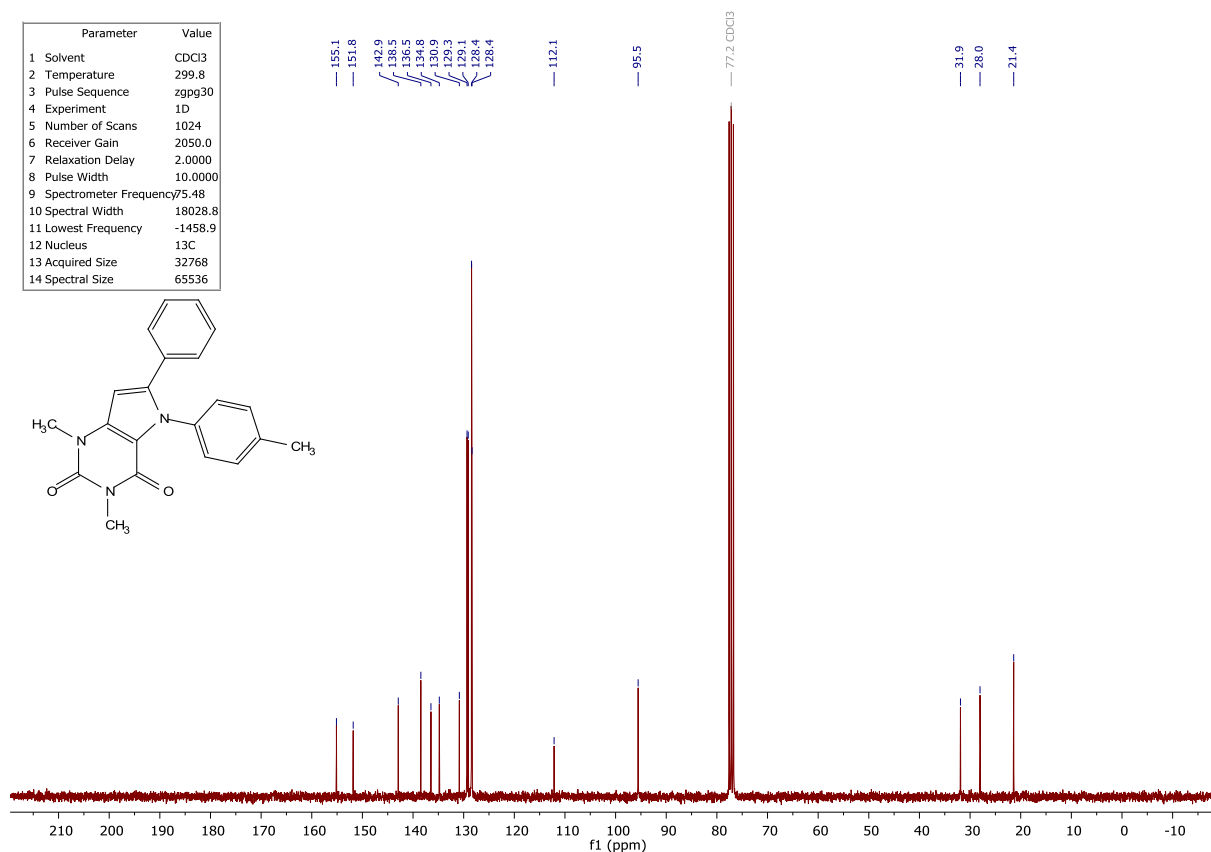

# 1,3-Dimethyl-5-(*o*-tolyl)-6-(*p*-tolyl)-1,5-dihydro-2*H*-pyrrolo[3,2-*d*]pyrimidine-2,4(3*H*)-dione (4e)

| Parameter                | Value             |
|--------------------------|-------------------|
| 1 Solvent                | CDCl <sub>3</sub> |
| 2 Temperature            | 298.2             |
| 3 Pulse Sequence         | zg30              |
| 4 Experiment             | 1D                |
| 5 Number of Scans        | 16                |
| 6 Receiver Gain          | 101.0             |
| 7 Relaxation Delay       | 1.0000            |
| 8 Pulse Width            | 8.0000            |
| 9 Spectrometer Frequency | 500.13            |
| 10 Spectral Width        | 10000.0           |
| 11 Lowest Frequency      | -1924.8           |
| 12 Nucleus               | <sup>1</sup> H    |
| 13 Acquired Size         | 32768             |
| 14 Spectral Size         | 65536             |

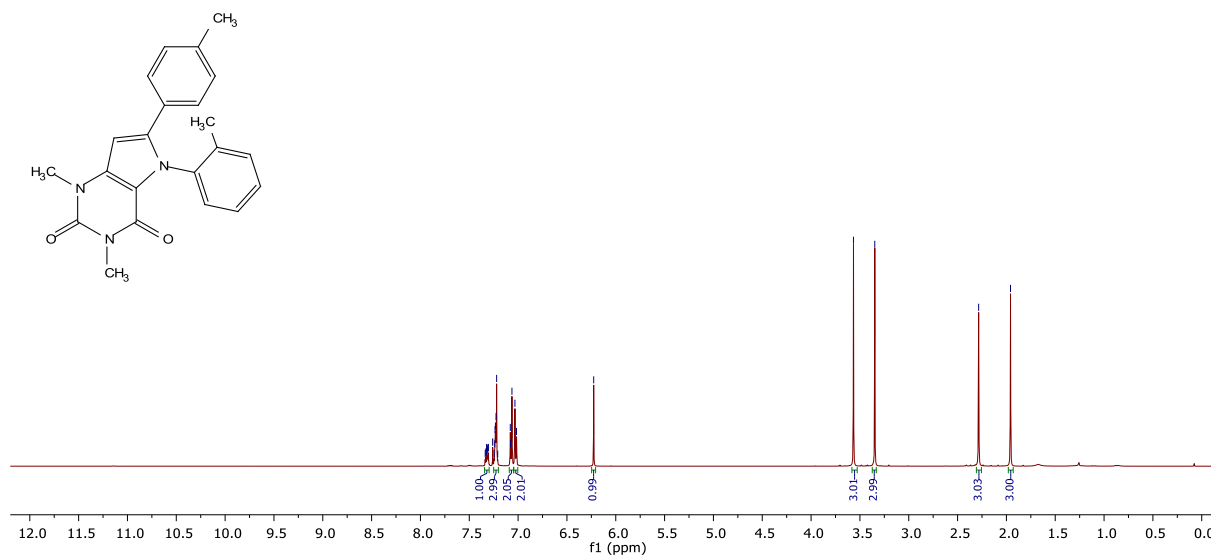

| Parameter                | Value             |
|--------------------------|-------------------|
| 1 Solvent                | CDCl <sub>3</sub> |
| 2 Temperature            | 298.1             |
| 3 Pulse Sequence         | zgpg30            |
| 4 Experiment             | 1D                |
| 5 Number of Scans        | 1024              |
| 6 Receiver Gain          | 101.0             |
| 7 Relaxation Delay       | 2.0000            |
| 8 Pulse Width            | 10.0000           |
| 9 Spectrometer Frequency | 125.77            |
| 10 Spectral Width        | 30120.5           |
| 11 Lowest Frequency      | -2473.4           |
| 12 Nucleus               | <sup>13</sup> C   |
| 13 Acquired Size         | 32768             |
| 14 Spectral Size         | 65536             |

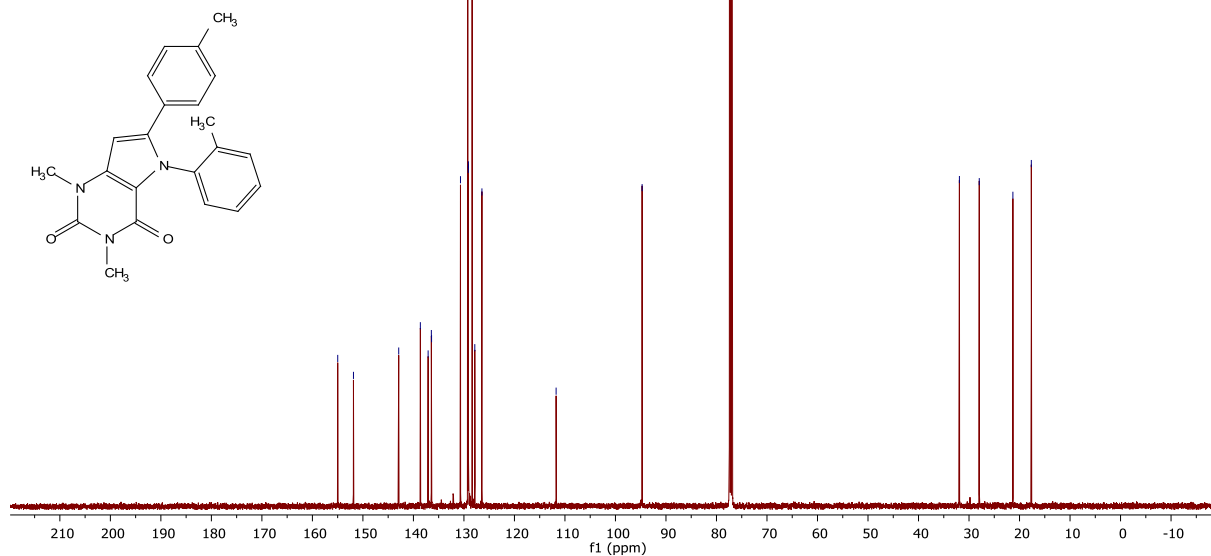

**5-(2-Bromophenyl)-1,3-dimethyl-6-(*p*-tolyl)-1,5-dihydro-2*H*-pyrrolo[3,2-*d*]pyrimidine-2,4(3*H*)-dione (4f)**

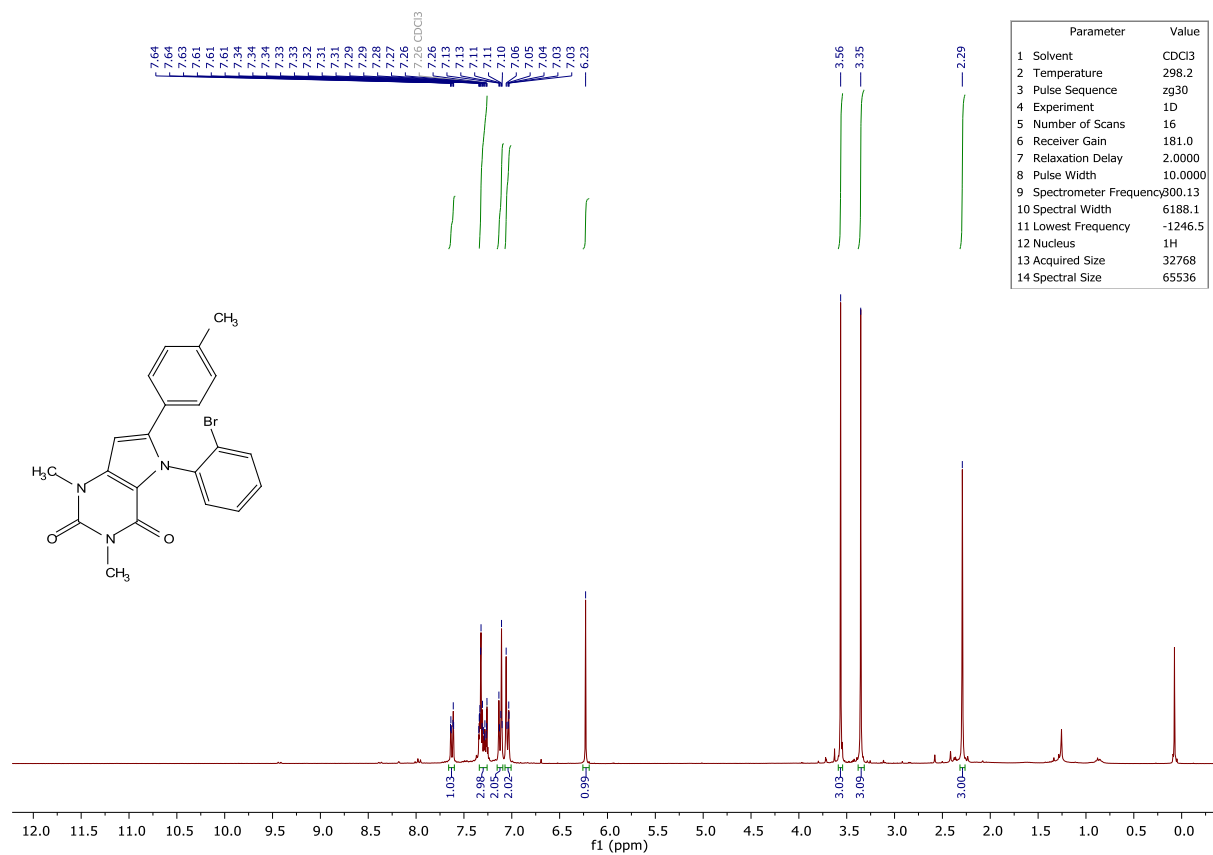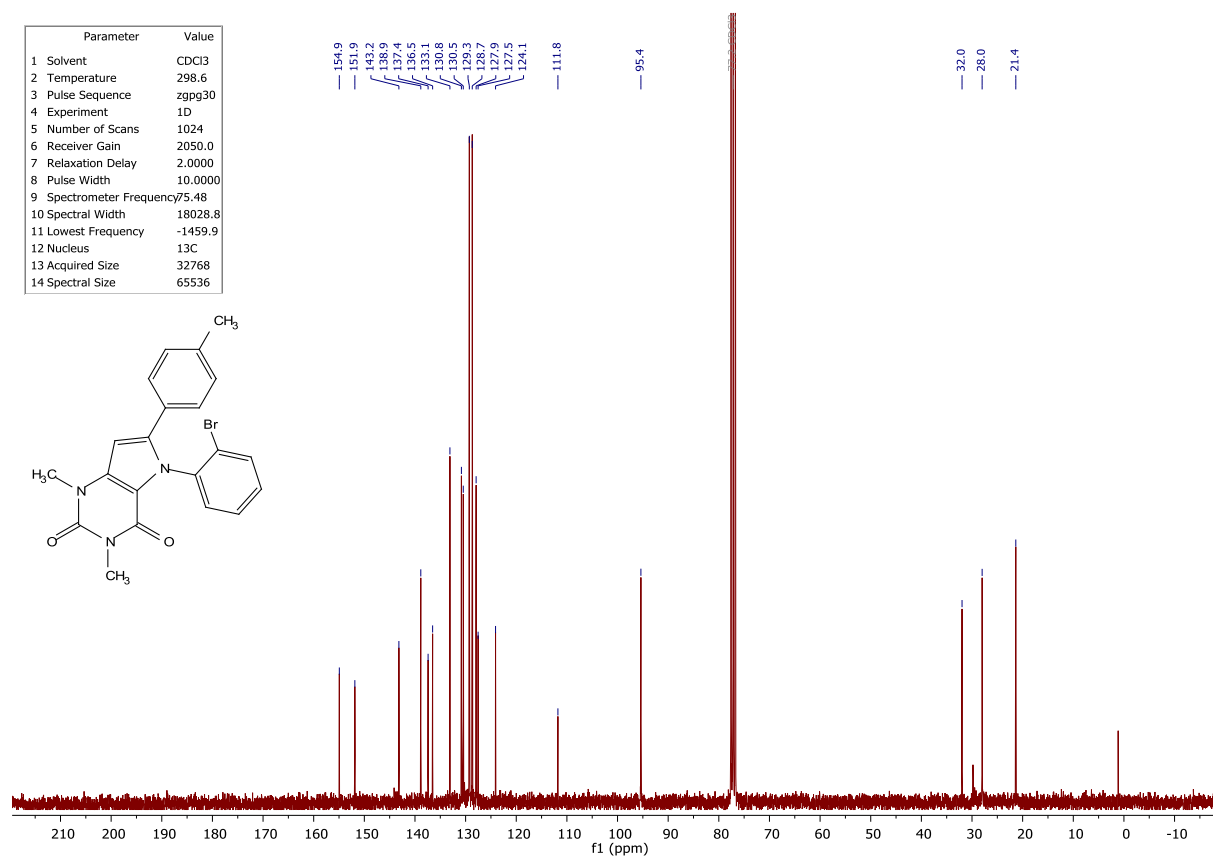

# 1,3-Dimethyl-6-(*o*-tolyl)-5-(*p*-tolyl)-1,5-dihydro-2*H*-pyrrolo[3,2-*d*]pyrimidine-2,4(3*H*)-dione (4g)

| Parameter                | Value             |
|--------------------------|-------------------|
| 1 Solvent                | CDCl <sub>3</sub> |
| 2 Temperature            | 298.6             |
| 3 Pulse Sequence         | zg30              |
| 4 Experiment             | 1D                |
| 5 Number of Scans        | 8                 |
| 6 Receiver Gain          | 161.0             |
| 7 Relaxation Delay       | 2.0000            |
| 8 Pulse Width            | 10.0000           |
| 9 Spectrometer Frequency | 300.13            |
| 10 Spectral Width        | 6188.1            |
| 11 Lowest Frequency      | -1246.4           |
| 12 Nucleus               | <sup>1</sup> H    |
| 13 Acquired Size         | 32768             |
| 14 Spectral Size         | 65536             |

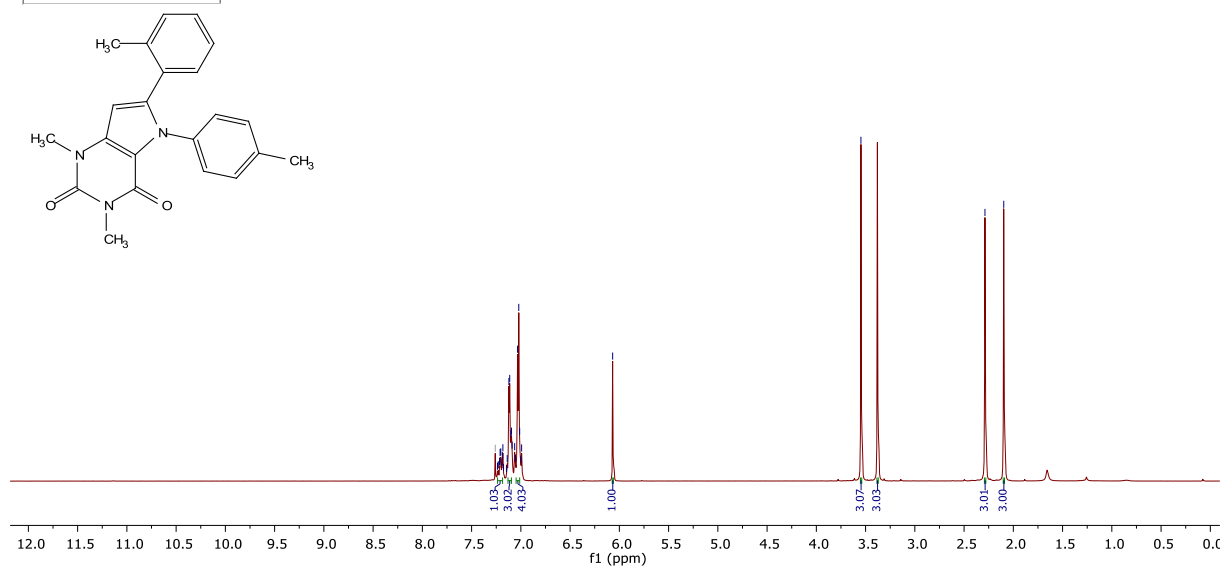

| Parameter                | Value             |
|--------------------------|-------------------|
| 1 Solvent                | CDCl <sub>3</sub> |
| 2 Temperature            | 299.3             |
| 3 Pulse Sequence         | zgpg30            |
| 4 Experiment             | 1D                |
| 5 Number of Scans        | 1024              |
| 6 Receiver Gain          | 2050.0            |
| 7 Relaxation Delay       | 2.0000            |
| 8 Pulse Width            | 10.0000           |
| 9 Spectrometer Frequency | 75.48             |
| 10 Spectral Width        | 18028.8           |
| 11 Lowest Frequency      | -1459.7           |
| 12 Nucleus               | <sup>13</sup> C   |
| 13 Acquired Size         | 32768             |
| 14 Spectral Size         | 65536             |

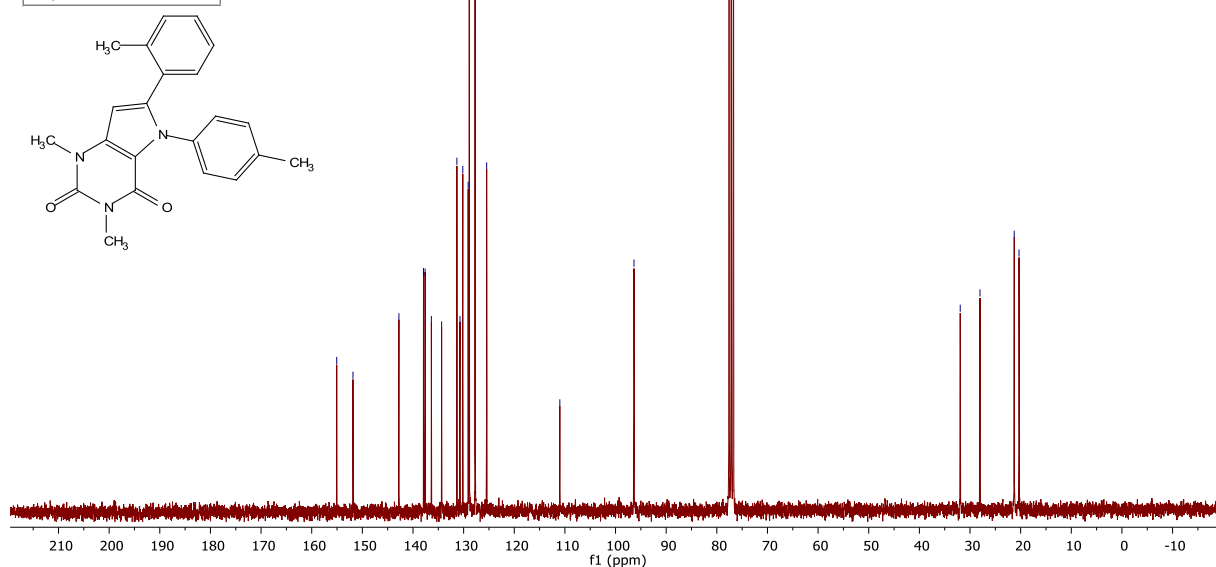

# 1,3-Dimethyl-6-(*m*-tolyl)-5-(*p*-tolyl)-1,5-dihydro-2*H*-pyrrolo[3,2-*d*]pyrimidine-2,4(3*H*)-dione (4h)

| Parameter                | Value             |
|--------------------------|-------------------|
| 1 Solvent                | CDCl <sub>3</sub> |
| 2 Temperature            | 298.2             |
| 3 Pulse Sequence         | zg30              |
| 4 Experiment             | 1D                |
| 5 Number of Scans        | 16                |
| 6 Receiver Gain          | 144.0             |
| 7 Relaxation Delay       | 2.0000            |
| 8 Pulse Width            | 10.0000           |
| 9 Spectrometer Frequency | 300.13            |
| 10 Spectral Width        | 6188.1            |
| 11 Lowest Frequency      | -1246.3           |
| 12 Nucleus               | <sup>1</sup> H    |
| 13 Acquired Size         | 32768             |
| 14 Spectral Size         | 65536             |

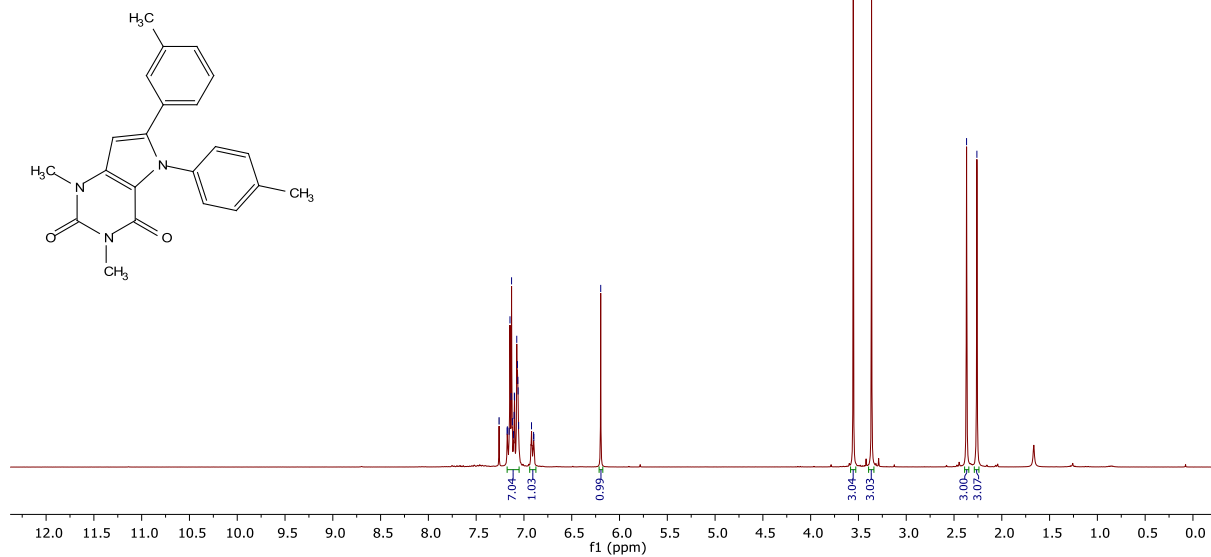

| Parameter                | Value             |
|--------------------------|-------------------|
| 1 Solvent                | CDCl <sub>3</sub> |
| 2 Temperature            | 299.2             |
| 3 Pulse Sequence         | zgpg30            |
| 4 Experiment             | 1D                |
| 5 Number of Scans        | 1024              |
| 6 Receiver Gain          | 2050.0            |
| 7 Relaxation Delay       | 2.0000            |
| 8 Pulse Width            | 10.0000           |
| 9 Spectrometer Frequency | 75.48             |
| 10 Spectral Width        | 18028.8           |
| 11 Lowest Frequency      | -1459.8           |
| 12 Nucleus               | <sup>13</sup> C   |
| 13 Acquired Size         | 32768             |
| 14 Spectral Size         | 65536             |

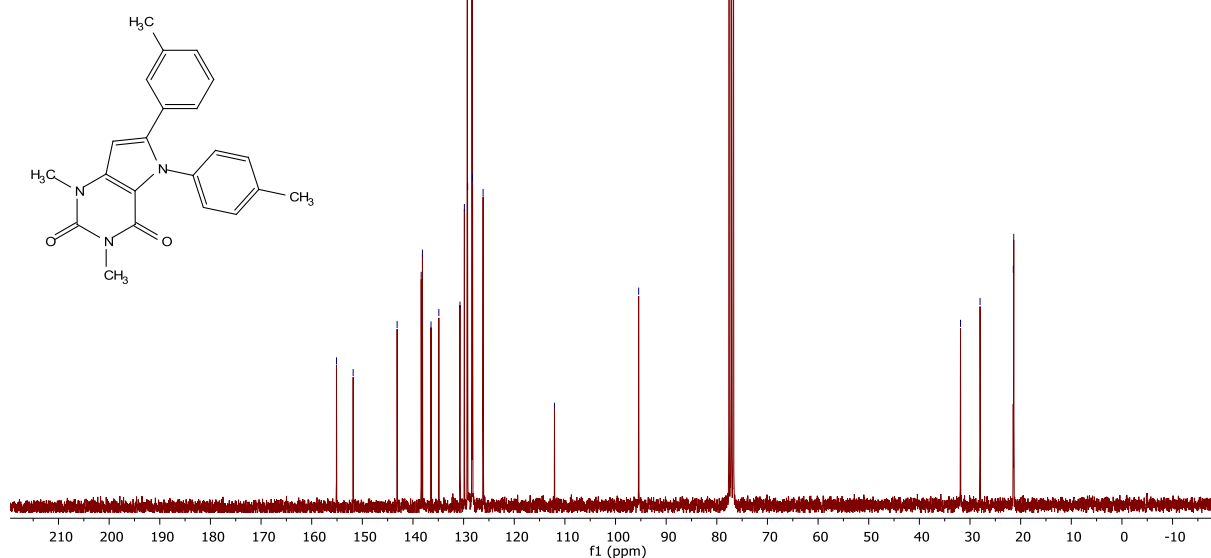

# 5-(4-Fluorophenyl)-1,3-dimethyl-6-(*p*-tolyl)-1,5-dihydro-2*H*-pyrrolo[3,2-*d*]pyrimidine-2,4(3*H*)-dione (4i)

| Parameter                | Value             |
|--------------------------|-------------------|
| 1 Solvent                | CDCl <sub>3</sub> |
| 2 Temperature            | 298.2             |
| 3 Pulse Sequence         | zg30              |
| 4 Experiment             | 1D                |
| 5 Number of Scans        | 16                |
| 6 Receiver Gain          | 114.0             |
| 7 Relaxation Delay       | 2.0000            |
| 8 Pulse Width            | 10.0000           |
| 9 Spectrometer Frequency | 300.13            |
| 10 Spectral Width        | 6188.1            |
| 11 Lowest Frequency      | -1269.3           |
| 12 Nucleus               | <sup>1</sup> H    |
| 13 Acquired Size         | 32768             |
| 14 Spectral Size         | 65536             |

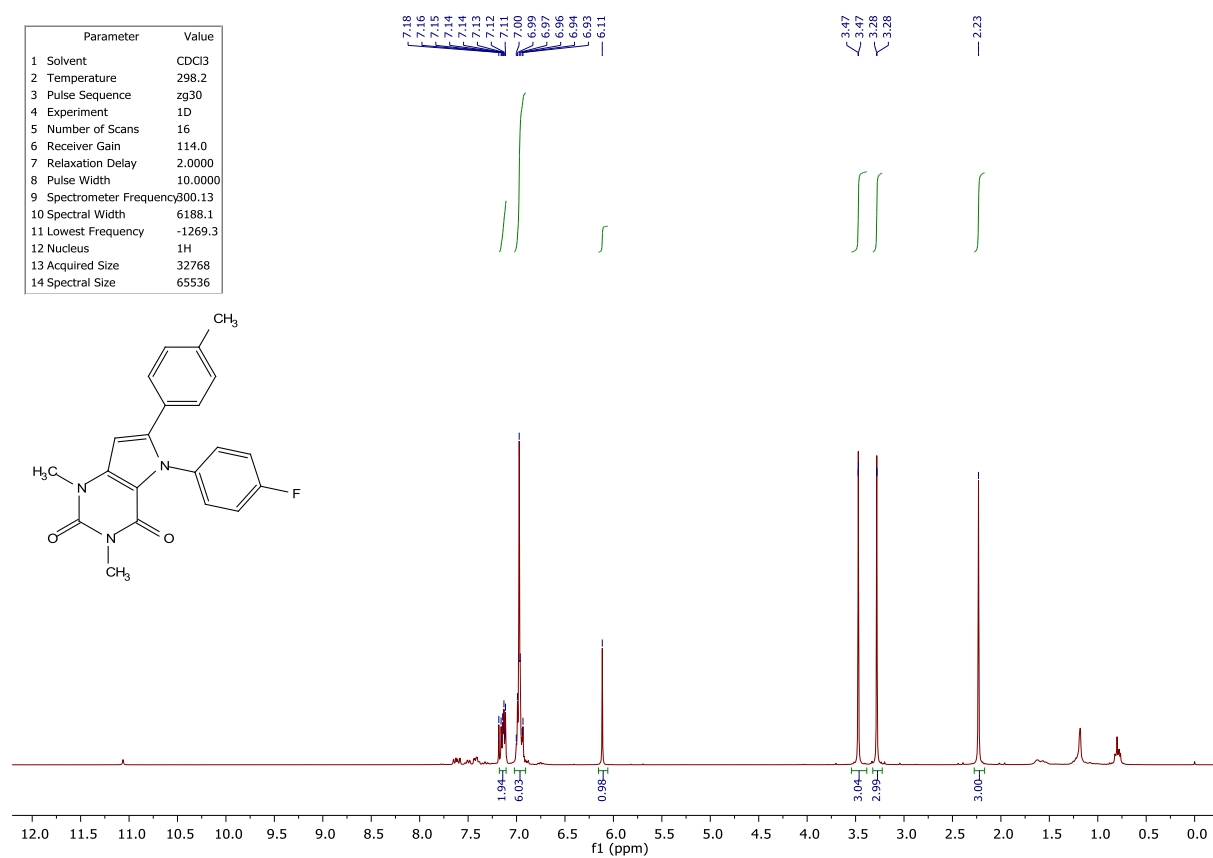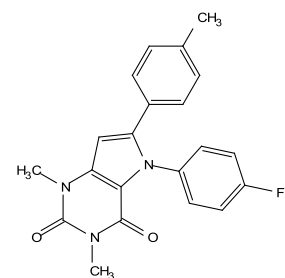

| Parameter                | Value             |
|--------------------------|-------------------|
| 1 Solvent                | CDCl <sub>3</sub> |
| 2 Temperature            | 298.2             |
| 3 Pulse Sequence         | zgfhgqn           |
| 4 Experiment             | 1D                |
| 5 Number of Scans        | 64                |
| 6 Receiver Gain          | 2050.0            |
| 7 Relaxation Delay       | 1.0000            |
| 8 Pulse Width            | 10.0000           |
| 9 Spectrometer Frequency | 282.38            |
| 10 Spectral Width        | 66964.3           |
| 11 Lowest Frequency      | -61722.4          |
| 12 Nucleus               | <sup>19</sup> F   |
| 13 Acquired Size         | 65536             |
| 14 Spectral Size         | 131072            |

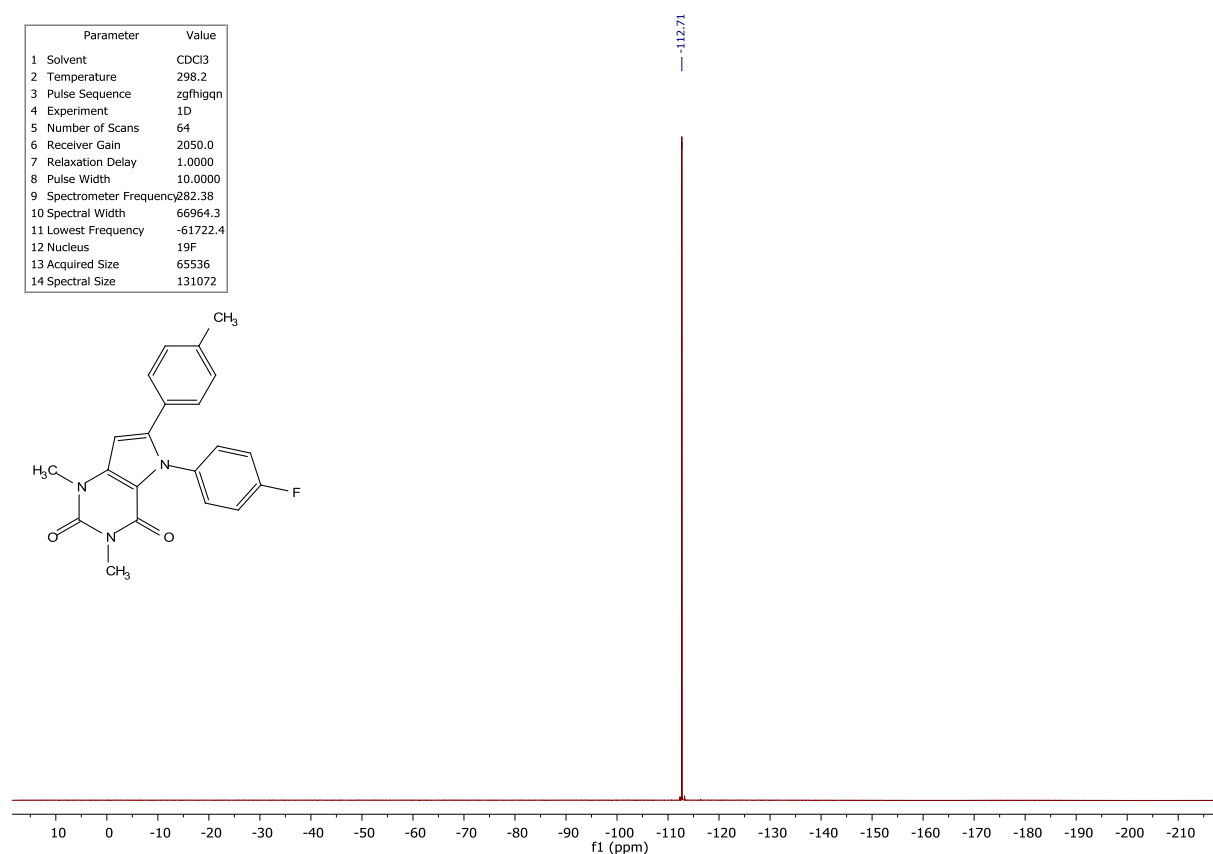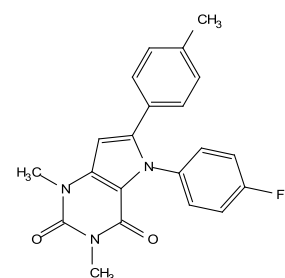

| Parameter                | Value           |
|--------------------------|-----------------|
| 1 Solvent                | CDCl3           |
| 2 Temperature            | 299.6           |
| 3 Pulse Sequence         | zgpg30          |
| 4 Experiment             | 1D              |
| 5 Number of Scans        | 1024            |
| 6 Receiver Gain          | 2050.0          |
| 7 Relaxation Delay       | 2.0000          |
| 8 Pulse Width            | 10.0000         |
| 9 Spectrometer Frequency | 75.48           |
| 10 Spectral Width        | 18028.8         |
| 11 Lowest Frequency      | -1460.7         |
| 12 Nucleus               | <sup>13</sup> C |
| 13 Acquired Size         | 32768           |
| 14 Spectral Size         | 65536           |

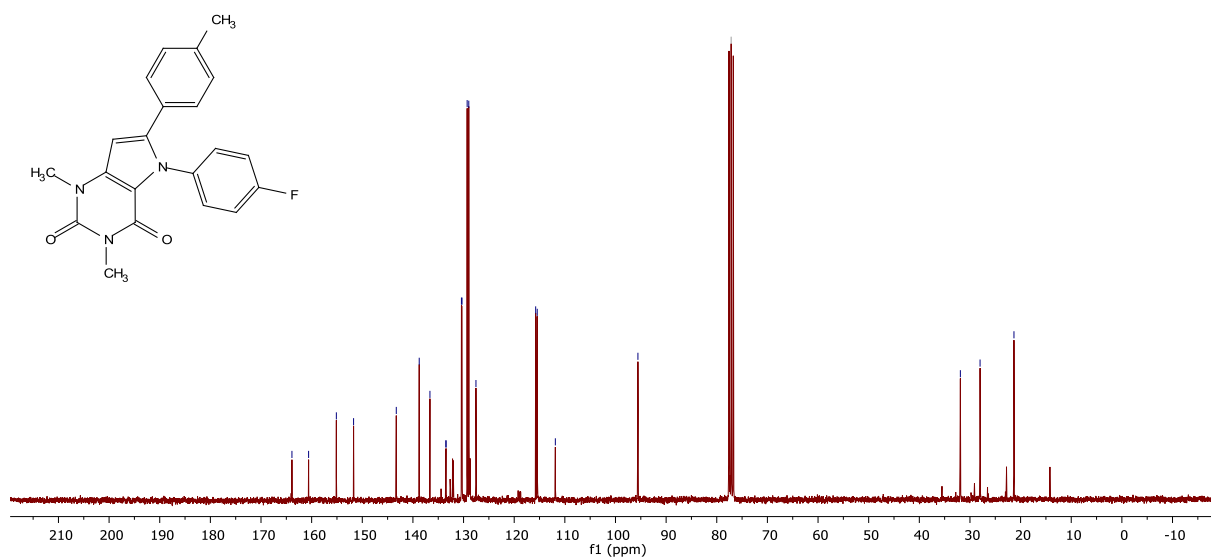

# 1,3-Dimethyl-6-(*p*-tolyl)-5-(4-(trifluoromethyl)phenyl)-1,5-dihydro-2*H*-pyrrolo[3,2-*d*]-pyrimidine-2,4(3*H*)-dione (4j)

| Parameter                | Value             |
|--------------------------|-------------------|
| 1 Solvent                | CDCl <sub>3</sub> |
| 2 Temperature            | 298.2             |
| 3 Pulse Sequence         | zg30              |
| 4 Experiment             | 1D                |
| 5 Number of Scans        | 16                |
| 6 Receiver Gain          | 144.0             |
| 7 Relaxation Delay       | 2.0000            |
| 8 Pulse Width            | 10.0000           |
| 9 Spectrometer Frequency | 300.13            |
| 10 Spectral Width        | 6188.1            |
| 11 Lowest Frequency      | -1246.3           |
| 12 Nucleus               | <sup>1</sup> H    |
| 13 Acquired Size         | 32768             |
| 14 Spectral Size         | 65536             |

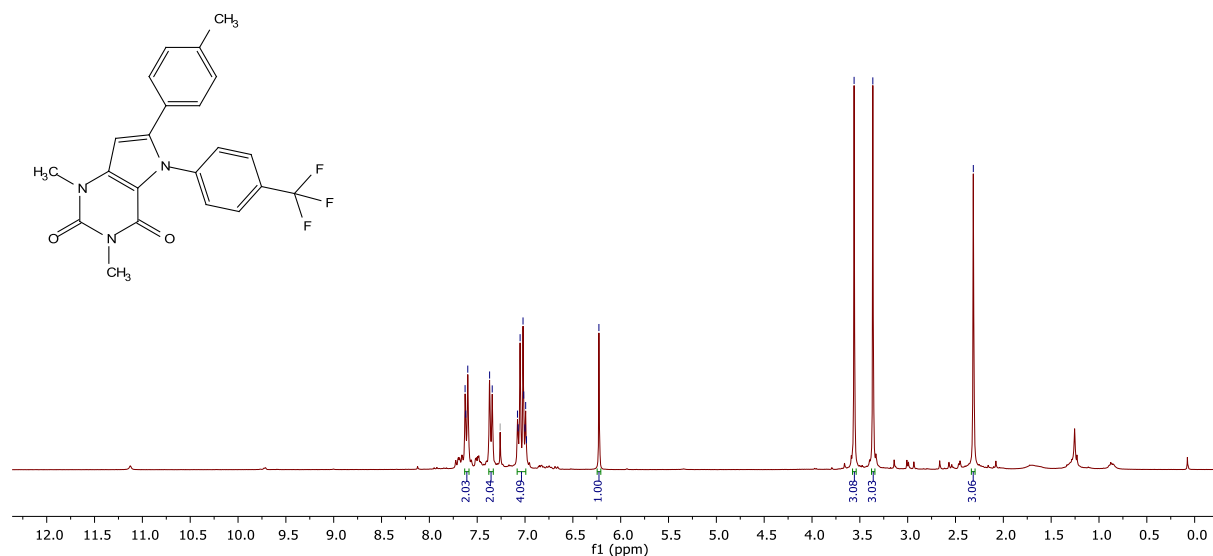

| Parameter                | Value             |
|--------------------------|-------------------|
| 1 Solvent                | CDCl <sub>3</sub> |
| 2 Temperature            | 298.3             |
| 3 Pulse Sequence         | zgfhgqn           |
| 4 Experiment             | 1D                |
| 5 Number of Scans        | 64                |
| 6 Receiver Gain          | 2050.0            |
| 7 Relaxation Delay       | 1.0000            |
| 8 Pulse Width            | 10.0000           |
| 9 Spectrometer Frequency | 282.38            |
| 10 Spectral Width        | 66964.3           |
| 11 Lowest Frequency      | -61722.4          |
| 12 Nucleus               | <sup>19</sup> F   |
| 13 Acquired Size         | 65536             |
| 14 Spectral Size         | 131072            |

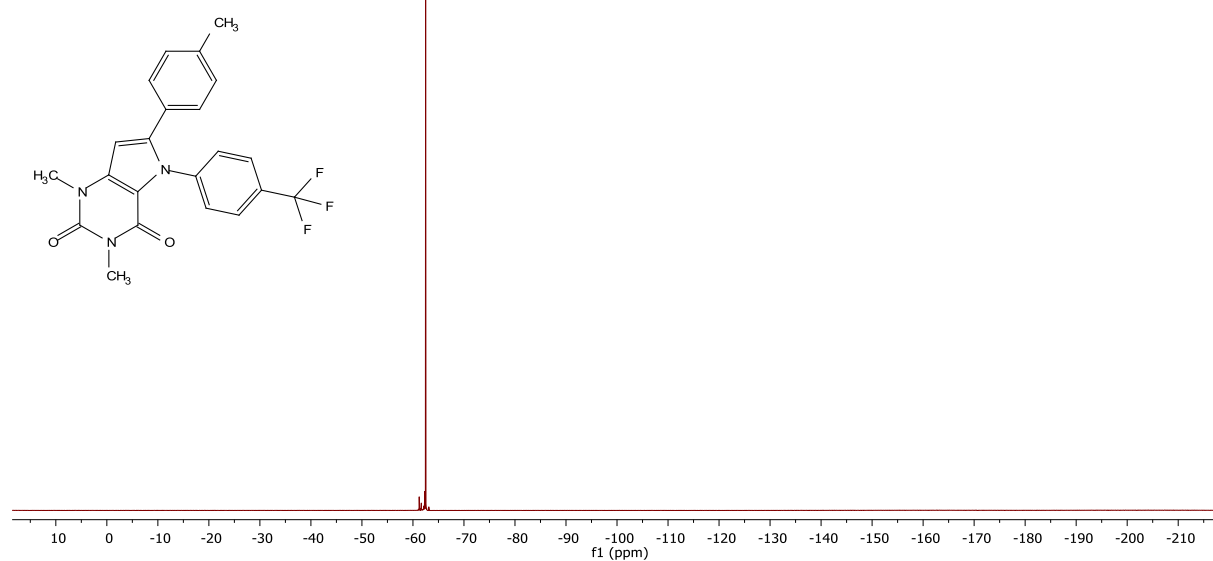

| Parameter                | Value           |
|--------------------------|-----------------|
| 1 Solvent                | CDCl3           |
| 2 Temperature            | 298.9           |
| 3 Pulse Sequence         | zgpg30          |
| 4 Experiment             | 1D              |
| 5 Number of Scans        | 1024            |
| 6 Receiver Gain          | 2050.0          |
| 7 Relaxation Delay       | 2.0000          |
| 8 Pulse Width            | 10.0000         |
| 9 Spectrometer Frequency | 75.48           |
| 10 Spectral Width        | 18028.8         |
| 11 Lowest Frequency      | -1459.5         |
| 12 Nucleus               | <sup>13</sup> C |
| 13 Acquired Size         | 32768           |
| 14 Spectral Size         | 65536           |

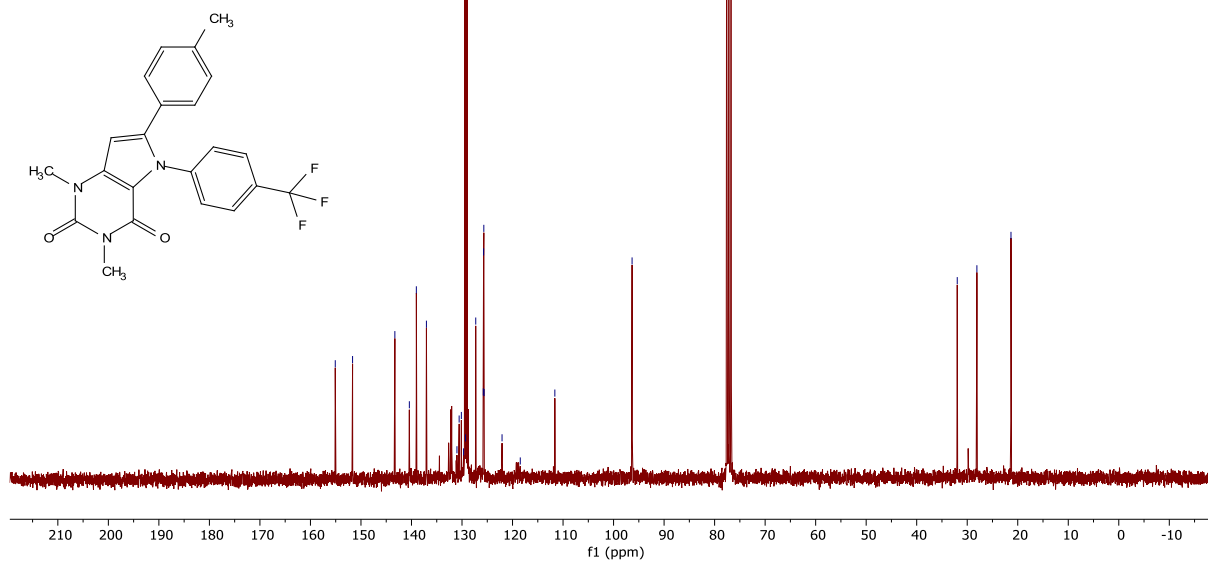

# 6-(4-(Dimethylamino)phenyl)-1,3-dimethyl-5-(*p*-tolyl)-1,5-dihydro-2*H*-pyrrolo[3,2-*d*]pyrimidine-2,4(3*H*)-dione (4k)

| Parameter                | Value             |
|--------------------------|-------------------|
| 1 Solvent                | CDCl <sub>3</sub> |
| 2 Temperature            | 298.6             |
| 3 Pulse Sequence         | zg30              |
| 4 Experiment             | 1D                |
| 5 Number of Scans        | 8                 |
| 6 Receiver Gain          | 228.0             |
| 7 Relaxation Delay       | 2.0000            |
| 8 Pulse Width            | 10.0000           |
| 9 Spectrometer Frequency | 300.13            |
| 10 Spectral Width        | 6188.1            |
| 11 Lowest Frequency      | -1246.6           |
| 12 Nucleus               | <sup>1</sup> H    |
| 13 Acquired Size         | 32768             |
| 14 Spectral Size         | 65536             |

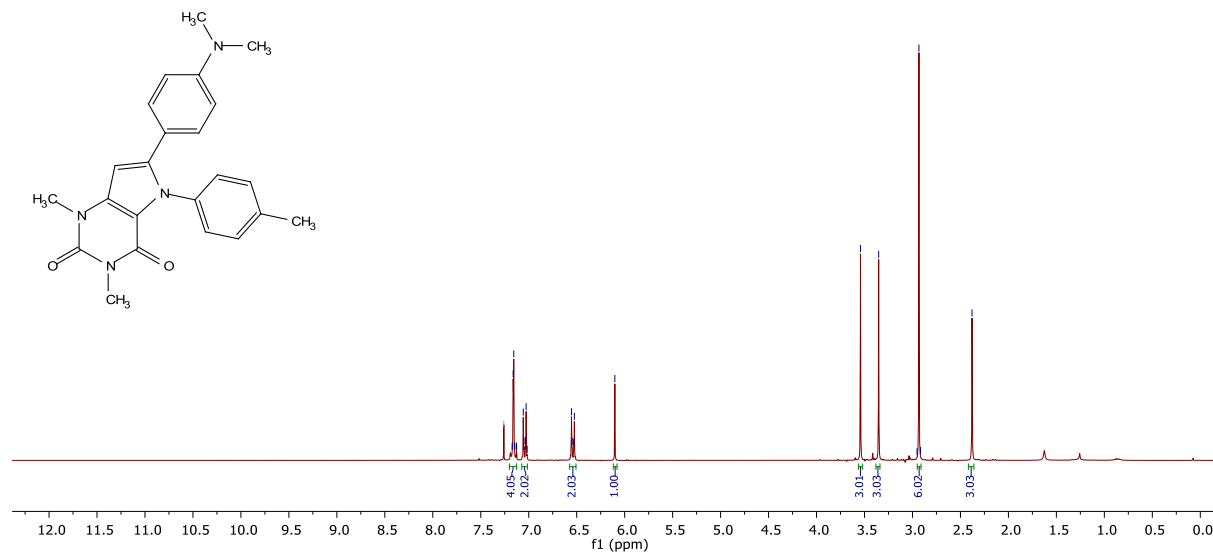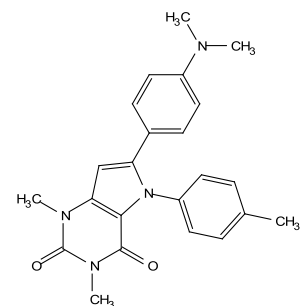

| Parameter                | Value             |
|--------------------------|-------------------|
| 1 Solvent                | CDCl <sub>3</sub> |
| 2 Temperature            | 298.7             |
| 3 Pulse Sequence         | zgpg30            |
| 4 Experiment             | 1D                |
| 5 Number of Scans        | 1024              |
| 6 Receiver Gain          | 2050.0            |
| 7 Relaxation Delay       | 2.0000            |
| 8 Pulse Width            | 10.0000           |
| 9 Spectrometer Frequency | 75.48             |
| 10 Spectral Width        | 18028.8           |
| 11 Lowest Frequency      | -1468.1           |
| 12 Nucleus               | <sup>13</sup> C   |
| 13 Acquired Size         | 32768             |
| 14 Spectral Size         | 65536             |

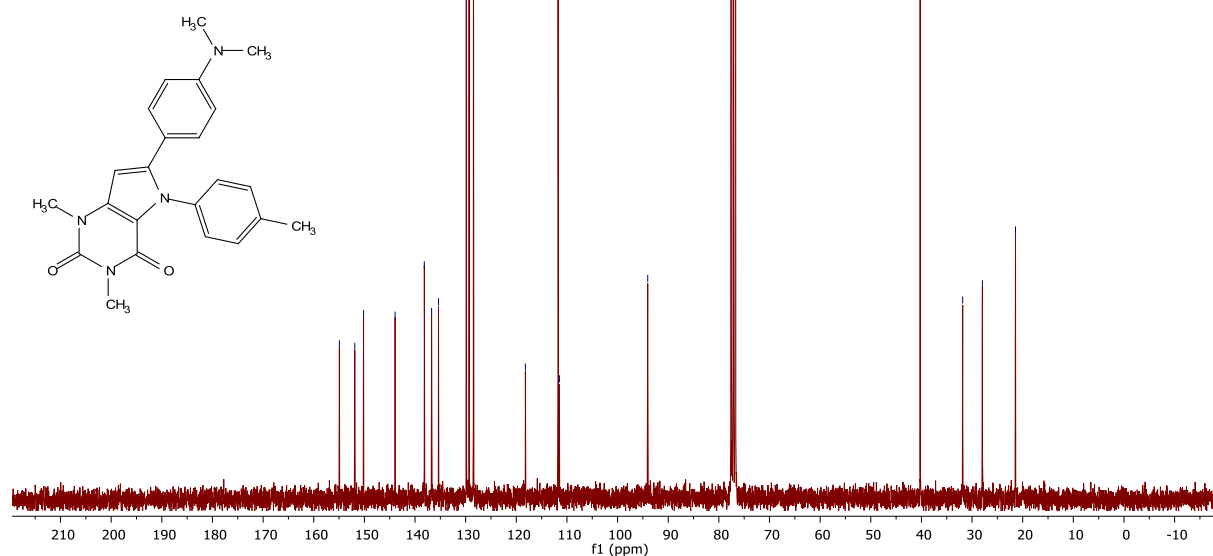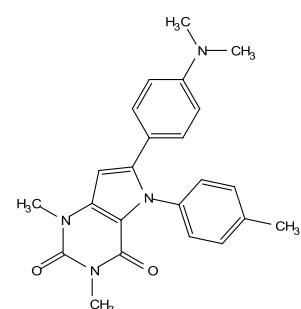

| Parameter                | Value             |
|--------------------------|-------------------|
| 1 Solvent                | CDCl <sub>3</sub> |
| 2 Temperature            | 298.2             |
| 3 Pulse Sequence         | zg30              |
| 4 Experiment             | 1D                |
| 5 Number of Scans        | 16                |
| 6 Receiver Gain          | 161.0             |
| 7 Relaxation Delay       | 2.0000            |
| 8 Pulse Width            | 10.0000           |
| 9 Spectrometer Frequency | 300.13            |
| 10 Spectral Width        | 6188.1            |
| 11 Lowest Frequency      | -1246.5           |
| 12 Nucleus               | <sup>1</sup> H    |
| 13 Acquired Size         | 32768             |
| 14 Spectral Size         | 65536             |

Chemical structure of the compound: 1-methyl-2-((4-(dimethylamino)phenyl)-1-methyl-1H-imidazol-5-yl)-4-(trifluoromethyl)benzene.

<sup>1</sup>H NMR spectrum (CDCl<sub>3</sub>) showing peaks at 7.64, 7.62, 7.61, 7.40, 7.39, 7.37, 7.36, 7.26, 6.99, 6.98, 6.96, 6.94, 6.87, 6.57, 6.56, 6.55, 6.53, 6.52, 6.41, 6.15, 3.55, 3.36, and 2.95 ppm.

Integration values: 2.07, 1.99, 2.04, 2.07, 1.05, 3.06, 2.97, and 6.00.

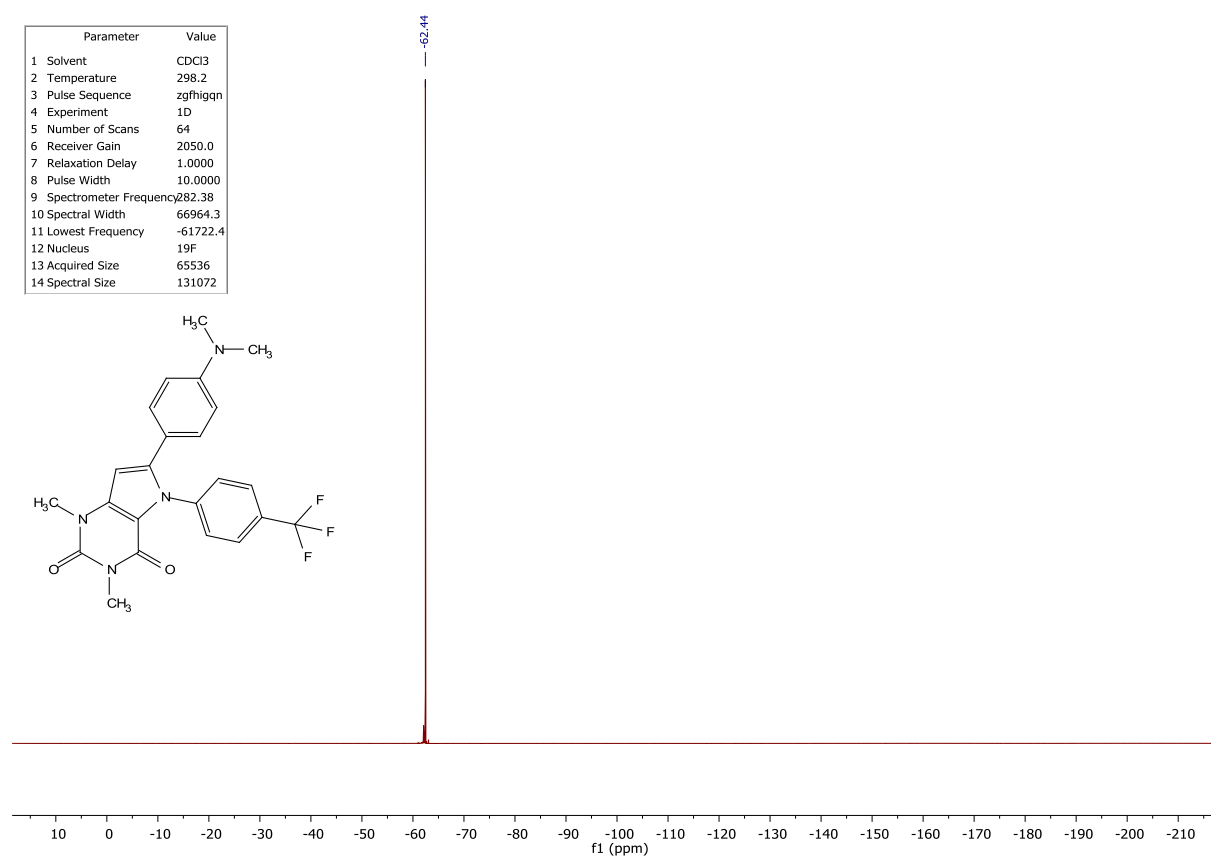

| Parameter                | Value           |
|--------------------------|-----------------|
| 1 Solvent                | CDCl3           |
| 2 Temperature            | 298.7           |
| 3 Pulse Sequence         | zgpg30          |
| 4 Experiment             | 1D              |
| 5 Number of Scans        | 1024            |
| 6 Receiver Gain          | 2050.0          |
| 7 Relaxation Delay       | 2.0000          |
| 8 Pulse Width            | 10.0000         |
| 9 Spectrometer Frequency | 75.48           |
| 10 Spectral Width        | 18028.8         |
| 11 Lowest Frequency      | -1459.3         |
| 12 Nucleus               | <sup>13</sup> C |
| 13 Acquired Size         | 32768           |
| 14 Spectral Size         | 65536           |

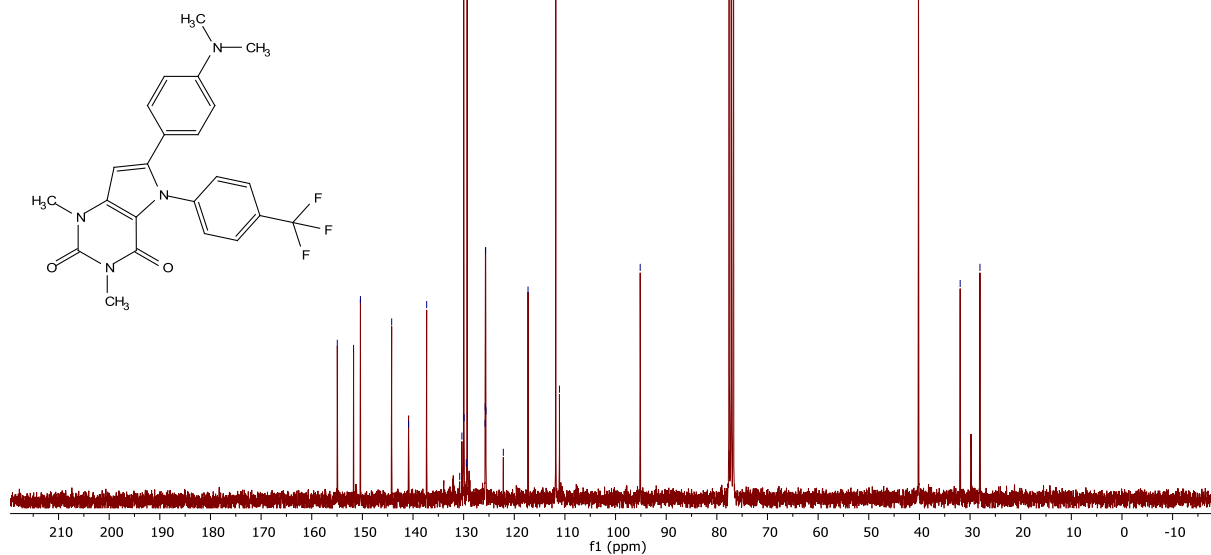

# 1,3-Dimethyl-6-(thiophen-3-yl)-5-(*p*-tolyl)-1,5-dihydro-2*H*-pyrrolo[3,2-*d*]pyrimidine-2,4(3*H*)-dione (4m)

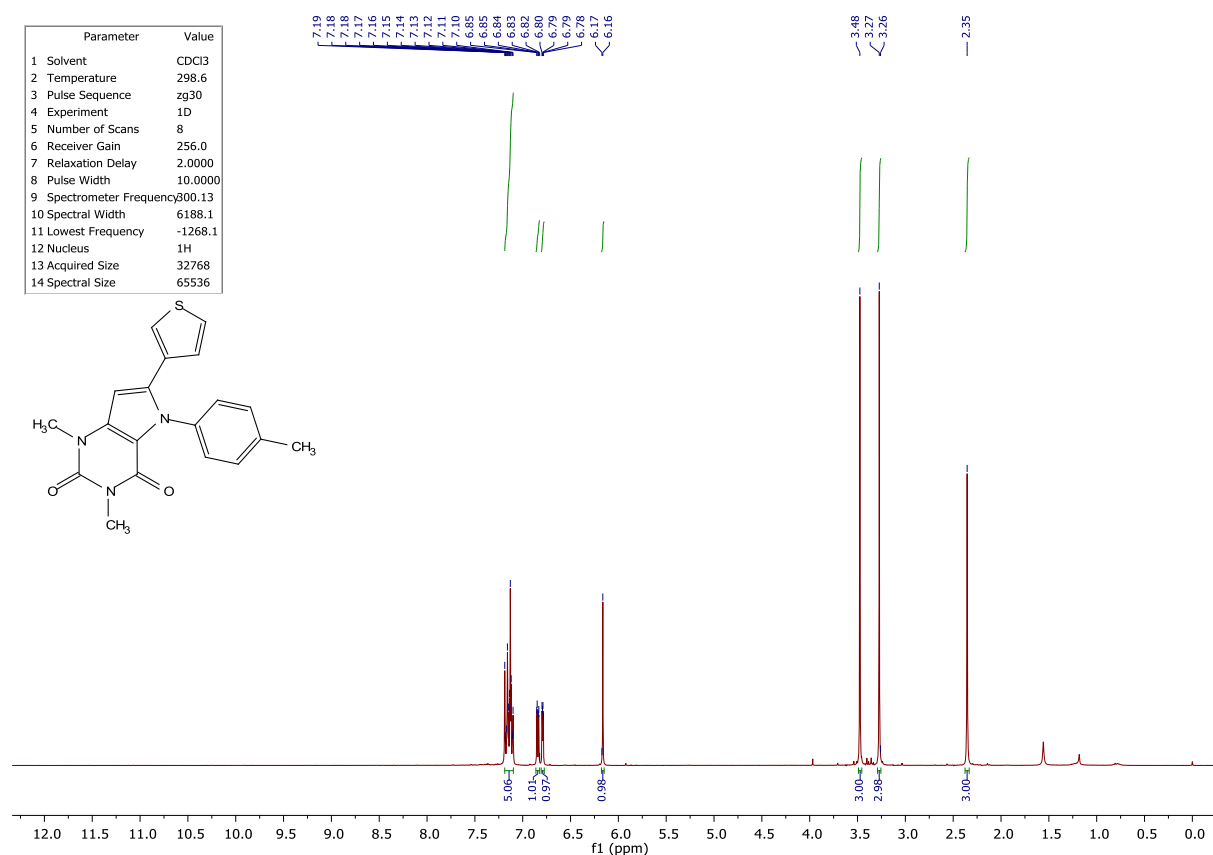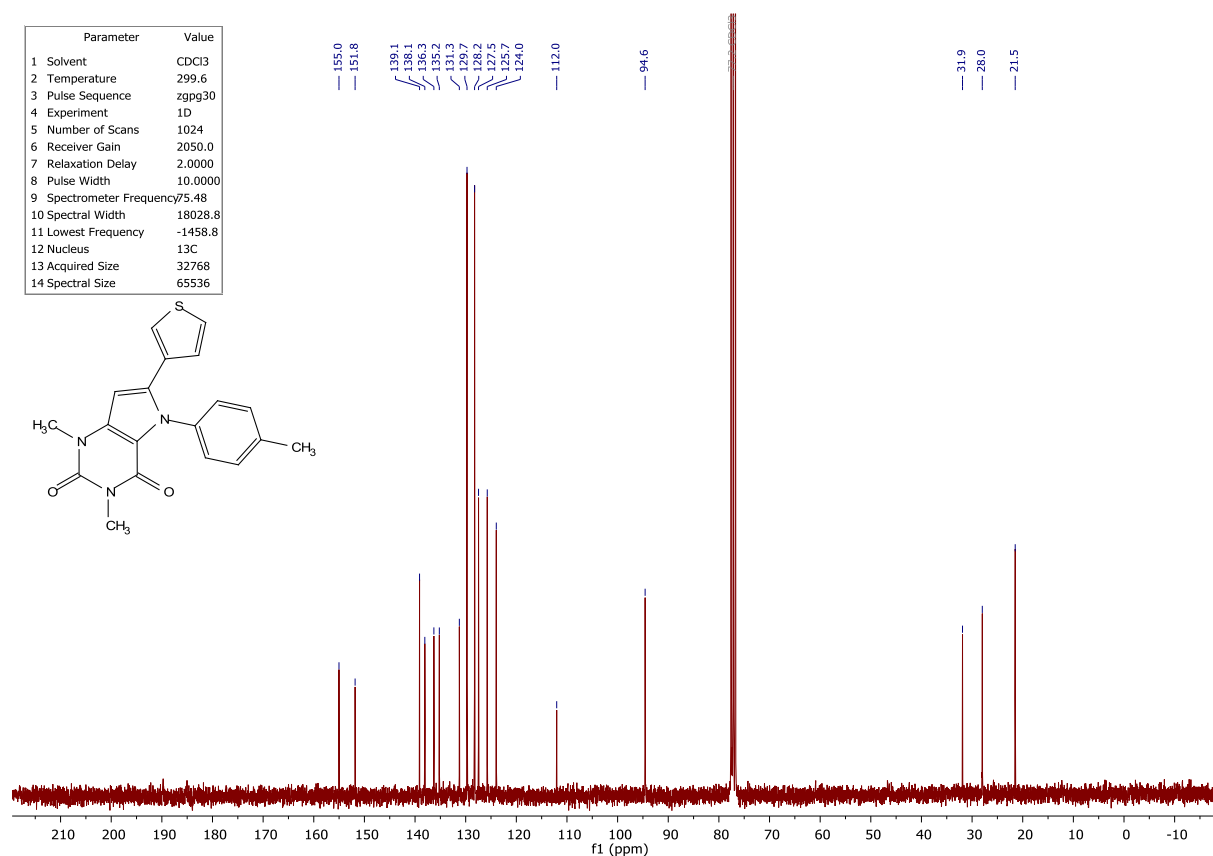

## References

- [1] Abreu, R. M. F. de; Brockmann, T.; Villinger, A.; Ehlers, P.; Langer, P. *Beilstein J. Org. Chem.* **2024**, *20*, 898–911. doi:10.3762/bjoc.20.80
